# Supplementary material for: Genome size, chromosome number determination, and analysis of the repetitive elements in Cissus quadrangularis
Source: PubMed Central journal article supplement (PMC6927348; doi:10.7717/peerj.8201), 2019-12-20
Supplement: peerj-07-8201-s002.pdf [file peerj-07-8201-s002.pdf]

## Clustering summary

If you use RepeatExplorer in your work please cite:

Novak, P., Neumann, P., Pech, J., Steinhaisl, J., Macas, J. (2013) - [RepeatExplorer: a Galaxy-based web server for genome-wide characterization of eukaryotic repetitive elements from next generation sequence reads](#), *Bioinformatics* 29:792-793.

or  
Novak, P., Neumann, P., Macas, J. (2010) - [Graph-based clustering and characterization of repetitive sequences in next-generation sequencing data](#), *BMC Bioinformatics* 11:378.

## Sequence clustering results

Number of sequences used for clustering: 7e+05

Number of similarity hits: 7516066

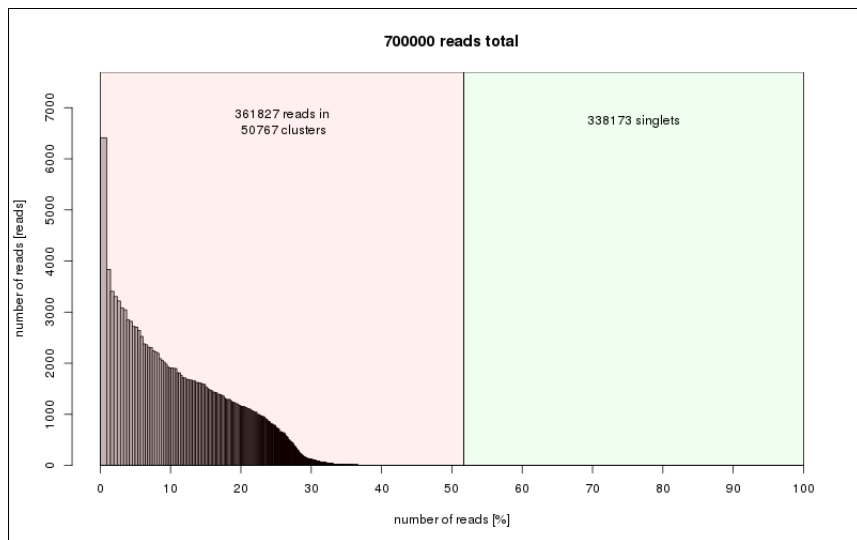

### Disclaimer

Automatic classification is experimental feature and work in progress and the results should be used with caution!

### Top clusters

| cluster | total cluster length [bp] | number of reads | Genome proportion [%] | cumulative GP [%] | Automatic classification | Super cluster | Repeat Masker | Protein domain hits                                                                                                                                                                                                                                                                                 | blastn hits                                                                                                                                                                                                        | Layout | Portion of similarity hits to other clusters [%] | Outside reads with similarity [%] |
|---------|---------------------------|-----------------|-----------------------|-------------------|--------------------------|---------------|---------------|-----------------------------------------------------------------------------------------------------------------------------------------------------------------------------------------------------------------------------------------------------------------------------------------------------|--------------------------------------------------------------------------------------------------------------------------------------------------------------------------------------------------------------------|--------|--------------------------------------------------|-----------------------------------|
| 1       | <a href="#">CL1</a>       | 961950          | 6413                  | 0.916             | 0.92                     | Not available | Not available | LTR.Gypsy (277hits, 2.71%)<br>Simple_repeat (141hits, 0.65%)<br>Low_complexity (81hits, 0.38%)<br>LTR.Copia (4hits, 0.0211%)<br>DNA.MULE.MuDR (1hits, 0.0078%)<br>DNA.hAT.Tip100 (1hits, 0.00468%)<br>Simple_repeat (300hits, 2.03%)<br>LTR.Gypsy (128hits, 1.78%)<br>Low_complexity (36hits, 0.3%) | DTA-CD1 NA NA (1 hits 0.0156%)<br>LINE-ENDO NA NA (1 hits 0.0156%)<br>LINE-RT NA NA (1 hits 0.0156%)<br>Ty3-RH Ty3/gypsy chromovirus (1 hits 0.0156%)<br>Ty3-RT Ty3/gypsy Athila (1 hits 0.0156%)                  |        | 1.4850                                           | 5.380                             |
| 2       | <a href="#">CL2</a>       | 575250          | 3835                  | 0.548             | 1.46                     | Not available | Not available | DNA.CMC.EnSpm (3hits, 0.0389%)<br>DNA.MULE.MuDR (2hits, 0.0236%)<br>RC.Helitron (1hits, 0.0151%)<br>LTR.Copia (2hits, 0.015.....)                                                                                                                                                                   | Ty1-RH Ty1/copia Tork (1 hits 0.0261%)                                                                                                                                                                             |        | 0.0187                                           | 0.157                             |
| 3       | <a href="#">CL3</a>       | 511050          | 3407                  | 0.487             | 1.95                     | Not available | Not available | LTR.Copia (1644hits, 35.1%)<br>LTR.Gypsy (30hits, 0.253%)<br>Simple_repeat (6hits, 0.0636%)<br>DNA.CMC.EnSpm (2hits, 0.0311%)<br>Low_complexity (2hits, 0.0188%)<br>DNA.P (1hits, 0.00939%)                                                                                                         | DTC-CD1 NA NA (2 hits 0.0587%)<br>Ty3-INT Ty3/gypsy Athila (2 hits 0.0587%)<br>Ty1-INT Ty1/copia Tork (1 hits 0.0294%)<br>Ty3-GAG Ty3/gypsy Athila (1 hits 0.0294%)<br>Ty3-INT Ty3/gypsy Ogre/Tat (1 hits 0.0294%) |        | 3.1540                                           | 13.710                            |
| 4       | <a href="#">CL4</a>       | 495600          | 3304                  | 0.472             | 2.42                     | Not available | Not available | LINE.L1 (1789hits, 44.5%)<br>Simple_repeat (18hits, 0.112%)<br>Low_complexity (7hits, 0.068%)<br>DNA.CMC.EnSpm (4hits, 0.0369%)<br>LTR.Copia (2hits,                                                                                                                                                | LINE-RT NA NA (674 hits 20.4%)<br>LINE-ENDO NA NA (251 hits 7.6%)<br>DHH-CD1 NA NA (1 hits 0.0303%)                                                                                                                |        | 0.0000                                           | 0.000                             |

|    |                      |             |       |      |               |               |                                                                                                                                                                                                                     |                                                                                                                                                                                                                                                                                                                                                                                                                                                                                                                     |                                                                                   |                                                                                       |        |        |  |  |  |  |  |  |  |
|----|----------------------|-------------|-------|------|---------------|---------------|---------------------------------------------------------------------------------------------------------------------------------------------------------------------------------------------------------------------|---------------------------------------------------------------------------------------------------------------------------------------------------------------------------------------------------------------------------------------------------------------------------------------------------------------------------------------------------------------------------------------------------------------------------------------------------------------------------------------------------------------------|-----------------------------------------------------------------------------------|---------------------------------------------------------------------------------------|--------|--------|--|--|--|--|--|--|--|
|    |                      |             |       |      |               |               | 0.0254%)<br>Satellite (1hits,<br>0.0119%)                                                                                                                                                                           |                                                                                                                                                                                                                                                                                                                                                                                                                                                                                                                     |                                                                                   |                                                                                       |        |        |  |  |  |  |  |  |  |
| 5  | <a href="#">CL5</a>  | 482550 3217 | 0.460 | 2.88 | Not available | Not available | LTR.Copia (2331hits,<br>56.7%)<br>Simple_repeat (4hits,<br>0.0317%)                                                                                                                                                 | Ty1-RT Ty1/copia<br>Angela (2 hits 0.0622%)                                                                                                                                                                                                                                                                                                                                                                                                                                                                         |                                                                                   |    | 4.5200 | 20.920 |  |  |  |  |  |  |  |
| 6  | <a href="#">CL6</a>  | 462450 3083 | 0.440 | 3.32 | Not available | Not available | LTR.Copia (224hits,<br>3.43%)<br>LTR.Gypsy (7hits,<br>0.0787%)<br>Simple_repeat (9hits,<br>0.0722%)<br>Low_complexity<br>(2hits, 0.0195%)                                                                           | Ty1-RT Ty1/copia AleII<br>(2 hits 0.0649%)<br>DTM-CD1 NA NA (1<br>hits 0.0324%)<br>Ty1-INT Ty1/copia AleII<br>(1 hits 0.0324%)<br>Ty1-INT Ty1/copia<br>Angela (1 hits 0.0324%)<br>Ty1-RT Ty1/copia<br>Maximus/SIRE (1 hits<br>0.0324%)<br>Ty3-.....                                                                                                                                                                                                                                                                 |                                                                                   |    | 3.5370 | 10.740 |  |  |  |  |  |  |  |
| 7  | <a href="#">CL7</a>  | 456600 3044 | 0.435 | 3.76 | Not available | Not available | Simple_repeat (57hits,<br>0.61%)<br>LTR.Gypsy (25hits,<br>0.299%)<br>Low_complexity<br>(18hits, 0.191%)<br>LTR.Copia (1hits,<br>0.0129%)                                                                            | Ty3-INT Ty3/gypsy<br>Athila (1 hits 0.0329%)<br>Ty3-INT Ty3/gypsy<br>Ogre/Tat (1 hits<br>0.0329%)                                                                                                                                                                                                                                                                                                                                                                                                                   | organelle/plastid (1 hits<br>0.0329%)                                             |    | 2.7140 | 16.330 |  |  |  |  |  |  |  |
| 8  | <a href="#">CL8</a>  | 427350 2849 | 0.407 | 4.16 | Not available | Not available | LTR.Copia (1410hits,<br>42.8%)<br>Simple_repeat<br>(126hits, 1.37%)<br>DNA.hAT.Ac (8hits,<br>0.17%)<br>Low_complexity<br>(9hits, 0.155%)<br>LTR.Gypsy (4hits,<br>0.0644%)<br>Satellite (1hits,<br>0.00702%)         | Ty1-RT Ty1/copia<br>Bianca (424 hits 14.9%)<br>Ty1-RH Ty1/copia<br>Bianca (215 hits 7.55%)<br>LINE-RT NA NA (1 hits<br>0.0351%)<br>Ty1-RT Ty1/copia<br>AleI/Retrofit (1 hits<br>0.0351%)                                                                                                                                                                                                                                                                                                                            | organelle/mitochondria<br>(1 hits 0.0351%)                                        |    | 0.0046 | 0.035  |  |  |  |  |  |  |  |
| 9  | <a href="#">CL9</a>  | 423000 2820 | 0.403 | 4.57 | Not available | Not available | LTR.Gypsy (640hits,<br>15.5%)<br>Simple_repeat (89hits,<br>0.681%)<br>Low_complexity<br>(16hits, 0.213%)<br>LTR.Copia (1hits,<br>0.0229%)                                                                           | DTC-CD1 NA NA (1<br>hits 0.0355%)<br>Ty3-RH Ty3/gypsy<br>chromovirus (1 hits<br>0.0355%)<br>Ty3-RT Ty3/gypsy<br>chromovirus (1 hits<br>0.0355%)                                                                                                                                                                                                                                                                                                                                                                     |                                                                                   |   | 1.1710 | 9.043  |  |  |  |  |  |  |  |
| 10 | <a href="#">CL10</a> | 407850 2719 | 0.388 | 4.96 | Not available | Not available | LTR.Gypsy (1999hits,<br>62.5%)<br>LTR.Copia (36hits,<br>0.563%)<br>Simple_repeat (2hits,<br>0.0184%)<br>Low_complexity<br>(1hits, 0.0108%)<br>rRNA (1hits,<br>0.00662%)                                             | Ty3-INT Ty3/gypsy<br>chromovirus (436 hits<br>16%)<br>Ty3-RT Ty3/gypsy<br>chromovirus (304 hits<br>11.2%)<br>Ty3-GAG Ty3/gypsy<br>chromovirus (220 hits<br>8.09%)<br>Ty3-RH Ty3/gypsy<br>chromovirus (165 hits<br>6.07%)<br>Ty3-PROT Ty3/gypsy<br>chrom.....<br>Ty3-INT Ty3/gypsy<br>Athila (1228 hits 45.4%)<br>Ty3-RH Ty3/gypsy<br>Athila (449 hits 16.6%)<br>Ty3-RT Ty3/gypsy<br>Athila (167 hits 6.17%)<br>Ty3-GAG Ty3/gypsy<br>chromovirus (1 hits<br>0.037%)<br>Ty3-INT Ty3/gypsy<br>Ogre/Tat (1 hits 0.037%) | organelle/mitochondria<br>(15 hits 0.552%)                                        |  | 0.1122 | 0.515  |  |  |  |  |  |  |  |
| 11 | <a href="#">CL11</a> | 405750 2705 | 0.386 | 5.34 | Not available | Not available | LTR.Gypsy (2713hits,<br>89%)<br>LTR.Copia. (133hits,<br>1.8%)<br>Low_complexity<br>(4hits, 0.0762%)<br>Simple_repeat (4hits,<br>0.0518%)<br>LTR (1hits, 0.0325%)                                                    | Ty3-INT Ty3/gypsy<br>Athila (1228 hits 45.4%)<br>Ty3-RH Ty3/gypsy<br>Athila (449 hits 16.6%)<br>Ty3-RT Ty3/gypsy<br>Athila (167 hits 6.17%)<br>Ty3-GAG Ty3/gypsy<br>chromovirus (1 hits<br>0.037%)<br>Ty3-INT Ty3/gypsy<br>Ogre/Tat (1 hits 0.037%)                                                                                                                                                                                                                                                                 | organelle/mitochondria<br>(4 hits 0.148%)<br>organelle/plastid (1 hits<br>0.037%) |  | 0.6020 | 2.625  |  |  |  |  |  |  |  |
| 12 | <a href="#">CL12</a> | 396150 2641 | 0.377 | 5.72 | Not available | Not available | Simple_repeat (48hits,<br>0.42%)<br>Low_complexity<br>(12hits, 0.147%)<br>LTR.Gypsy (1hits,<br>0.0212%)<br>LTR.Copia. (2hits,<br>0.0202%)<br>DNA.CMC.EnSpm<br>(2hits, 0.0187%)<br>DNA.MULE.MuDR<br>(1hits, 0.0159%) |                                                                                                                                                                                                                                                                                                                                                                                                                                                                                                                     |                                                                                   |  | 0.3460 | 1.250  |  |  |  |  |  |  |  |
| 13 | <a href="#">CL13</a> | 378600 2524 | 0.361 | 6.08 | Not available | Not available | LTR.Gypsy (107hits,<br>2.07%)<br>Low_complexity<br>(64hits, 1.12%)<br>Simple_repeat (65hits,<br>0.875%)                                                                                                             | Ty3-RT Ty3/gypsy<br>Athila (2 hits 0.0792%)<br>Ty3-GAG Ty3/gypsy<br>Athila (1 hits 0.0396%)<br>Ty3-INT Ty3/gypsy                                                                                                                                                                                                                                                                                                                                                                                                    | organelle/mitochondria<br>(1 hits 0.0396%)                                        |  | 2.8120 | 22.820 |  |  |  |  |  |  |  |

|    |                      |             |       |      |               |               |                                                                                                                                                                                                                          |                                                                                                                                                                                                                          |                                                                                       |                                                                                       |        |       |  |
|----|----------------------|-------------|-------|------|---------------|---------------|--------------------------------------------------------------------------------------------------------------------------------------------------------------------------------------------------------------------------|--------------------------------------------------------------------------------------------------------------------------------------------------------------------------------------------------------------------------|---------------------------------------------------------------------------------------|---------------------------------------------------------------------------------------|--------|-------|--|
|    |                      |             |       |      |               |               |                                                                                                                                                                                                                          | LTR.Copia (3hits, 0.0338%)                                                                                                                                                                                               | Athila (1 hits 0.0396%)                                                               |                                                                                       |        |       |  |
| 14 | <a href="#">CL14</a> | 356700 2378 | 0.340 | 6.42 | Not available | Not available | LTR.Copia ( <b>882hits, 27%</b> )<br>Simple_repeat (41hits, 0.513%)<br>LTR.Gypsy (2hits, 0.0252%)<br>DNA.CMC.EnSpm (1hits, 0.0154%)                                                                                      | Ty1-GAG Ty1/copia<br>Angela (380 hits 16%)<br>DHH-CD2 NA NA (1 hits 0.0421%)<br>Ty1-INT Ty1/copia<br>AleI/Retrofit (1 hits 0.0421%)                                                                                      |    | 1.1670                                                                                | 3.911  |       |  |
| 15 | <a href="#">CL15</a> | 353850 2359 | 0.337 | 6.76 | Not available | Not available | LTR.Gypsy ( <b>497hits, 14.1%</b> )<br>Simple_repeat (80hits, 0.832%)<br>Low_complexity (50hits, 0.707%)<br>LTR.Copia (15hits, 0.239%)<br>DNA.CMC.EnSpm (1hits, 0.0147%)                                                 | DTM-CD1 NA NA (2 hits 0.0848%)<br>Ty1-INT Ty1/copia<br>Angela (2 hits 0.0848%)<br>Ty1-RT Ty1/copia<br>Angela (1 hits 0.0424%)<br>Ty1-RT Ty1/copia Tork (1 hits 0.0424%)<br>Ty3-RH Ty3/gypsy chromovirus (1 hits 0.0424%) |    | 0.0663                                                                                | 0.466  |       |  |
| 16 | <a href="#">CL16</a> | 346650 2311 | 0.330 | 7.09 | Not available | Not available | LTR.Copia ( <b>611hits, 17.1%</b> )<br>Simple_repeat (47hits, 0.637%)<br>LTR.Gypsy (16hits, 0.243%)                                                                                                                      | Ty3-INT Ty3/gypsy<br>Ogre/Tat (7 hits 0.303%)<br>Ty1-RH Ty1/copia<br>Angela (1 hits 0.0433%)                                                                                                                             |    | 6.9220                                                                                | 20.770 |       |  |
| 17 | <a href="#">CL17</a> | 345750 2305 | 0.329 | 7.42 | Not available | Not available | LTR.Copia ( <b>1625hits, 61.4%</b> )<br>Simple_repeat (49hits, 0.649%)<br>Low_complexity (10hits, 0.141%)<br>LTR.Gypsy (1hits, 0.0142%)                                                                                  | Ty1-INT Ty1/copia<br>Angela (550 hits 23.9%)<br>Ty1-GAG Ty1/copia<br>Angela (336 hits 14.6%)<br>Ty1-PROT Ty1/copia<br>Angela (224 hits 9.72%)                                                                            |    | 2.0640                                                                                | 8.416  |       |  |
| 18 | <a href="#">CL18</a> | 336300 2242 | 0.320 | 7.74 | Not available | Not available | LTR.Copia ( <b>2200hits, 92%</b> )<br>LTR.Gypsy (2hits, 0.0274%)                                                                                                                                                         | Ty1-RT Ty1/copia<br>Angela (1879 hits 83.8%)<br>Ty1-RT Ty1/copia<br>AleI/Retrofit (1 hits 0.0446%)<br>Ty1-RT Ty1/copia AleII (1 hits 0.0446%)                                                                            |   | 4.4030                                                                                | 12.310 |       |  |
| 19 | <a href="#">CL19</a> | 332850 2219 | 0.317 | 8.05 | Not available | Not available | rRNA ( <b>961hits, 38.3%</b> )                                                                                                                                                                                           | 45S_rDNA/18S_rDNA (937 hits 42.2%)<br>organelle/mitochondria (13 hits 0.586%)                                                                                                                                            |  | 2.8550                                                                                | 8.157  |       |  |
| 20 | <a href="#">CL20</a> | 329100 2194 | 0.313 | 8.37 | Not available | Not available | LTR.Copia ( <b>2116hits, 90.6%</b> )<br>LTR.Gypsy (2hits, 0.0249%)<br>LTR (1hits, 0.0188%)                                                                                                                               | Ty1-RH Ty1/copia<br>Angela (1033 hits 47.1%)<br>Ty1-RT Ty1/copia<br>Angela (208 hits 9.48%)                                                                                                                              |  | 6.2240                                                                                | 17.180 |       |  |
| 21 | <a href="#">CL21</a> | 313350 2089 | 0.298 | 8.67 | Not available | Not available | Simple_repeat (104hits, 1.46%)<br>LTR.Copia (95hits, 0.893%)<br>LTR.Gypsy (3hits, 0.0654%)<br>rRNA (2hits, 0.0453%)<br>Low_complexity (3hits, 0.0329%)<br>DNA.MULE.MuDR (1hits, 0.023%)<br>DNA.MULE.MuDR (1hits, 0.014%) | DTM-CD1 NA NA (1 hits 0.0479%)<br>Ty1-GAG Ty1/copia<br>Bianca (1 hits 0.0479%)<br>Ty1-INT Ty1/copia<br>Angela (1 hits 0.0479%)<br>Ty3-GAG Ty3/gypsy<br>Athila (1 hits 0.0479%)                                           | 45S_rDNA/18S_rDNA (2 hits 0.0957%)                                                    |  | 0.5733 | 5.026 |  |
| 22 | <a href="#">CL22</a> | 308850 2059 | 0.294 | 8.96 | Not available | Not available | LTR.Gypsy ( <b>1575hits, 69.8%</b> )<br>Low_complexity (53hits, 1.07%)<br>Simple_repeat (50hits, 0.923%)<br>DNA.CMC.EnSpm (1hits, 0.0133%)                                                                               | Ty3-RT Ty3/gypsy<br>Athila (524 hits 25.4%)<br>Ty3-PROT Ty3/gypsy<br>Athila (320 hits 15.5%)<br>Ty3-PROT Ty3/gypsy<br>Ogre/Tat (7 hits 0.34%)<br>LINE-RT NA NA (1 hits 0.0486%)                                          | organelle/plastid (4 hits 0.194%)                                                     |  | 0.7264 | 3.788 |  |
| 23 | <a href="#">CL23</a> | 303000 2020 | 0.289 | 9.25 | Not available | Not available | LTR.Gypsy ( <b>643hits, 18%</b> )<br>Low_complexity (30hits, 0.5%)<br>Simple_repeat (25hits, 0.383%)<br>DNA.PIF.Harbinger (5hits, 0.0604%)                                                                               | Ty3-GAG Ty3/gypsy<br>Athila (454 hits 22.5%)                                                                                                                                                                             | organelle/mitochondria (1 hits 0.0495%)                                               |  | 0.5129 | 2.624 |  |

|    |                      |        |      |       |       |               |                                                            |                                                                                                                                                                                                                         |                                                                                                                                                                                                                                   |                                                                                |                                                                                       |        |        |  |  |  |  |  |  |
|----|----------------------|--------|------|-------|-------|---------------|------------------------------------------------------------|-------------------------------------------------------------------------------------------------------------------------------------------------------------------------------------------------------------------------|-----------------------------------------------------------------------------------------------------------------------------------------------------------------------------------------------------------------------------------|--------------------------------------------------------------------------------|---------------------------------------------------------------------------------------|--------|--------|--|--|--|--|--|--|
|    |                      |        |      |       |       |               | LINE.L1 (1hits, 0.0182%)<br>DNA.CMC.EnSpm (1hits, 0.0155%) |                                                                                                                                                                                                                         |                                                                                                                                                                                                                                   |                                                                                |                                                                                       |        |        |  |  |  |  |  |  |
| 24 | <a href="#">CL24</a> | 297150 | 1981 | 0.283 | 9.53  | Not available | Not available                                              | LTR.Gypsy (259hits, 8.37%)<br>LTR.Copia (13hits, 0.536%)<br>Simple_repeat (31hits, 0.414%)<br>Low_complexity (22hits, 0.31%)<br>DNA.MULE.MuDR (1hits, 0.0158%)<br>rRNA (1hits, 0.0138%)                                 | Ty1-RH Ty1/copia Ivana/Oryco (9 hits 0.454%)<br>DTM-CD1 NA NA (1 hits 0.0505%)<br>Ty1-RT Ty1/copia Angela (1 hits 0.0505%)<br>Ty1-RT Ty1/copia Ivana/Oryco (1 hits 0.0505%)                                                       | organelle/mitochondria (2 hits 0.101%)                                         |    | 0.3186 | 2.625  |  |  |  |  |  |  |
| 25 | <a href="#">CL25</a> | 288600 | 1924 | 0.275 | 9.81  | Not available | Not available                                              | LTR.Copia (1576hits, 70.4%)<br>Simple_repeat (9hits, 0.119%)<br>LTR.Gypsy (4hits, 0.0894%)<br>LTR.Caulimovirus (4hits, 0.087%)<br>LINE.L1 (2hits, 0.044%)<br>LTR (1hits, 0.0326%)<br>DNA.PIF.Harbinger (1hits, 0.0118%) | Ty1-INT Ty1/copia Tork (258 hits 13.4%)<br>Ty1-GAG Ty1/copia Tork (206 hits 10.7%)<br>Ty1-RT Ty1/copia Tork (158 hits 8.21%)<br>Ty1-PROT Ty1/copia Tork (107 hits 5.56%)<br>Ty1-RH Ty1/copia Tork (68 hits 3.53%)<br>DTM-CD1..... | organelle/mitochondria (13 hits 0.676%)                                        |    | 0.2428 | 0.676  |  |  |  |  |  |  |
| 26 | <a href="#">CL26</a> | 286350 | 1909 | 0.273 | 10.10 | Not available | Not available                                              | LTR.Copia (1739hits, 85.5%)                                                                                                                                                                                             | Ty1-INT Ty1/copia Angela (934 hits 48.9%)<br>Ty1-PROT Ty1/copia Angela (325 hits 17%)<br>LINE-RT NA NA (1 hits 0.0524%)                                                                                                           |                                                                                |    | 3.2140 | 12.410 |  |  |  |  |  |  |
| 27 | <a href="#">CL27</a> | 285600 | 1904 | 0.272 | 10.40 | Not available | Not available                                              | Simple_repeat (109hits, 1.33%)<br>Low_complexity (30hits, 0.483%)<br>LTR.Copia (1hits, 0.0119%)                                                                                                                         |                                                                                                                                                                                                                                   | organelle/plastid (1975 hits 104%)<br>organelle/mitochondria (153 hits 8.04%)  |    | 0.8263 | 3.624  |  |  |  |  |  |  |
| 28 | <a href="#">CL28</a> | 285000 | 1900 | 0.271 | 10.60 | Not available | Not available                                              | rRNA (1889hits, 96.9%)<br>Simple_repeat (1hits, 0.0151%)                                                                                                                                                                |                                                                                                                                                                                                                                   | 45S_rDNA/18S_rDNA (1881 hits 99%)<br>45S_rDNA/25S_rDNA (1 hits 0.0526%)        |  | 2.2690 | 4.579  |  |  |  |  |  |  |
| 29 | <a href="#">CL29</a> | 284100 | 1894 | 0.271 | 10.90 | Not available | Not available                                              | Simple_repeat (101hits, 1.29%)<br>Low_complexity (27hits, 0.479%)<br>LTR.Copia (11hits, 0.367%)                                                                                                                         | Ty1-RH Ty1/copia AleI/Retrofit (10 hits 0.528%)                                                                                                                                                                                   | organelle/plastid (1490 hits 78.7%)<br>organelle/mitochondria (354 hits 18.7%) |  | 0.5818 | 2.218  |  |  |  |  |  |  |
| 30 | <a href="#">CL30</a> | 271950 | 1813 | 0.259 | 11.20 | Not available | Not available                                              | DNA.CMC.EnSpm (90hits, 1.7%)<br>Simple_repeat (3hits, 0.068%)                                                                                                                                                           |                                                                                                                                                                                                                                   | organelle/plastid (3680 hits 203%)                                             |  | 1.4290 | 5.681  |  |  |  |  |  |  |
| 31 | <a href="#">CL31</a> | 271500 | 1810 | 0.259 | 11.40 | Not available | Not available                                              | LTR.Gypsy (89hits, 1.19%)<br>Simple_repeat (31hits, 0.542%)<br>Low_complexity (8hits, 0.149%)                                                                                                                           |                                                                                                                                                                                                                                   | organelle/plastid (3368 hits 186%)<br>organelle/mitochondria (1 hits 0.0552%)  |  | 0.8964 | 4.420  |  |  |  |  |  |  |
| 32 | <a href="#">CL32</a> | 263850 | 1759 | 0.251 | 11.70 | Not available | Not available                                              | LTR.Copia (1029hits, 50.4%)<br>Simple_repeat (31hits, 0.456%)<br>Low_complexity (22hits, 0.352%)<br>LTR.Gypsy (7hits, 0.121%)                                                                                           | Ty1-RT Ty1/copia TAR (157 hits 8.93%)<br>Ty1-RH Ty1/copia TAR (88 hits 5%)<br>Ty1-GAG Ty1/copia TAR (44 hits 2.5%)<br>Ty1-RT Ty1/copia AleII (7 hits 0.398%)<br>Ty1-RT Ty1/copia AleI/Retrofit (5 hits 0.284%)                    |                                                                                |  | 0.0408 | 0.341  |  |  |  |  |  |  |

|    |                      |             |       |       |               |               |                                                                                                                                                       |                                                                                                                                                                                                                                                      |                                                                                |                                                                                       |        |        |
|----|----------------------|-------------|-------|-------|---------------|---------------|-------------------------------------------------------------------------------------------------------------------------------------------------------|------------------------------------------------------------------------------------------------------------------------------------------------------------------------------------------------------------------------------------------------------|--------------------------------------------------------------------------------|---------------------------------------------------------------------------------------|--------|--------|
| 33 | <a href="#">CL33</a> | 258000 1720 | 0.246 | 11.90 | Not available | Not available | LTR.Copia (1549hits, 83.6%)<br>Simple_repeat (32hits, 0.454%)<br>LINE.L1 (3hits, 0.13%)                                                               | Ty1-RH Ty1.....<br>Ty1-RT Ty1/copia AleII (688 hits 40%)<br>Ty1-RH Ty1/copia AleII (404 hits 23.5%)<br>Ty1-RT Ty1/copia Ivana/Oryco (21 hits 1.22%)<br>LINE-RT NA NA (4 hits 0.233%)<br>Ty1-RT Ty1/copia Tork (4 hits 0.233%)<br>Ty1-RT Ty1/cop..... | organelle/mitochondria (97 hits 5.64%)                                         | 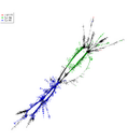   | 0.1617 | 0.930  |
| 34 | <a href="#">CL34</a> | 257100 1714 | 0.245 | 12.20 | Not available | Not available | Simple_repeat (189hits, 2.73%)<br>LTR.Copia (22hits, 0.499%)<br>DNA.CMC.EnSpm (39hits, 0.497%)                                                        | DTM-CD1 NA NA (3 hits 0.175%)<br>Ty1-RT Ty1/copia Ivana/Oryco (1 hits 0.0583%)                                                                                                                                                                       | organelle/plastid (1608 hits 93.8%)<br>organelle/mitochondria (80 hits 4.67%)  |    | 0.3056 | 1.109  |
| 35 | <a href="#">CL35</a> | 253050 1687 | 0.241 | 12.40 | Not available | Not available | Simple_repeat (68hits, 0.833%)<br>Low_complexity (13hits, 0.246%)<br>LTR.Gypsy (1hits, 0.0126%)                                                       |                                                                                                                                                                                                                                                      | organelle/plastid (1585 hits 94%)<br>organelle/mitochondria (135 hits 8%)      |    | 0.2489 | 1.897  |
| 36 | <a href="#">CL36</a> | 252300 1682 | 0.240 | 12.60 | Not available | Not available | Simple_repeat (126hits, 1.73%)<br>LTR.Copia (1hits, 0.019%)<br>Low_complexity (1hits, 0.0123%)                                                        |                                                                                                                                                                                                                                                      | organelle/plastid (1568 hits 93.2%)<br>organelle/mitochondria (132 hits 7.85%) |    | 0.3549 | 1.962  |
| 37 | <a href="#">CL37</a> | 250800 1672 | 0.239 | 12.90 | Not available | Not available | LTR.Gypsy (492hits, 20.6%)<br>Simple_repeat (69hits, 0.953%)<br>Low_complexity (28hits, 0.638%)<br>LTR.Copia. (7hits, 0.141%)<br>LTR (1hits, 0.0459%) | DTM-CD1 NA NA (1 hits 0.0598%)<br>LINE-ENDO NA NA (1 hits 0.0598%)                                                                                                                                                                                   |                                                                                |   | 1.0030 | 7.177  |
| 38 | <a href="#">CL38</a> | 250200 1668 | 0.238 | 13.10 | Not available | Not available | Simple_repeat (89hits, 1.32%)<br>Low_complexity (1hits, 0.0136%)                                                                                      |                                                                                                                                                                                                                                                      | organelle/plastid (3286 hits 197%)<br>organelle/mitochondria (36 hits 2.16%)   |  | 1.8510 | 5.156  |
| 39 | <a href="#">CL39</a> | 248250 1655 | 0.236 | 13.30 | Not available | Not available | LTR.Gypsy (122hits, 4.06%)<br>Simple_repeat (76hits, 1.57%)<br>Low_complexity (55hits, 1.5%)<br>LTR.Copia (11hits, 0.251%)                            | Ty1-INT Ty1/copia Ivana/Oryco (1 hits 0.0604%)<br>Ty1-RT Ty1/copia Angela (1 hits 0.0604%)<br>Ty3-RH Ty3/gypsy Athila (1 hits 0.0604%)                                                                                                               |                                                                                |  | 2.9970 | 14.800 |
| 40 | <a href="#">CL40</a> | 247500 1650 | 0.236 | 13.60 | Not available | Not available | LTR.Gypsy (318hits, 12.6%)<br>Simple_repeat (42hits, 0.768%)<br>Low_complexity (15hits, 0.339%)<br>LTR.Copia (8hits, 0.191%)                          | Ty3-RT Ty3/gypsy Athila (2 hits 0.121%)<br>Ty1-INT Ty1/copia AleII (1 hits 0.0606%)                                                                                                                                                                  |                                                                                |  | 0.4266 | 5.455  |
| 41 | <a href="#">CL41</a> | 243450 1623 | 0.232 | 13.80 | Not available | Not available | Simple_repeat (89hits, 1.04%)                                                                                                                         |                                                                                                                                                                                                                                                      | organelle/plastid (3235 hits 199%)<br>organelle/mitochondria (59 hits 3.64%)   |  | 1.1920 | 4.559  |
| 42 | <a href="#">CL42</a> | 243000 1620 | 0.231 | 14.00 | Not available | Not available | rRNA (146hits, 4.84%)<br>LTR.Gypsy (97hits, 1.93%)                                                                                                    | Ty3-RH Ty3/gypsy Athila (4 hits 0.247%)<br>Ty1-RT Ty1/copia Angela (3 hits 0.185%)                                                                                                                                                                   | organelle/plastid (3098 hits 191%)<br>organelle/mitochondria (82 hits 5.06%)   |  | 1.3820 | 3.333  |

|    |                      |             |       |       |               |               |                                                                                                                               |                                                                                                                                                                                                                                        |                                                                                       |                                                                                       |        |       |
|----|----------------------|-------------|-------|-------|---------------|---------------|-------------------------------------------------------------------------------------------------------------------------------|----------------------------------------------------------------------------------------------------------------------------------------------------------------------------------------------------------------------------------------|---------------------------------------------------------------------------------------|---------------------------------------------------------------------------------------|--------|-------|
| 43 | <a href="#">CL43</a> | 242700 1618 | 0.231 | 14.30 | Not available | Not available | LTR.Copia (8hits, 0.183%)<br>Simple_repeat (7hits, 0.119%)                                                                    | Ty3-INT Ty3/gypsy Athila (2 hits 0.124%)<br>Ty3-INT Ty3/gypsy chromovirus (2 hits 0.124%)                                                                                                                                              |     | 1.2150                                                                                | 7.169  |       |
| 44 | <a href="#">CL44</a> | 240600 1604 | 0.229 | 14.50 | Not available | Not available | rRNA (1605hits, 98.5%)<br>Simple_repeat (1hits, 0.0121%)                                                                      | 45S_rDNA/25S_rDNA (1601 hits 99.8%)                                                                                                                                                                                                    |    | 4.2430                                                                                | 11.160 |       |
| 45 | <a href="#">CL45</a> | 238350 1589 | 0.227 | 14.70 | Not available | Not available | Simple_repeat (35hits, 0.684%)<br>LTR.Gypsy (7hits, 0.369%)<br>Low_complexity (2hits, 0.0537%)                                |                                                                                                                                                                                                                                        |    | 0.9682                                                                                | 10.510 |       |
| 46 | <a href="#">CL46</a> | 237750 1585 | 0.226 | 15.00 | Not available | Not available | Simple_repeat (83hits, 1.34%)<br>Low_complexity (1hits, 0.0177%)                                                              | organelle/plastid (1571 hits 99.1%)<br>organelle/mitochondria (1 hits 0.0631%)                                                                                                                                                         |    | 0.9126                                                                                | 2.587  |       |
| 47 | <a href="#">CL47</a> | 230400 1536 | 0.219 | 15.20 | Not available | Not available | rRNA (1346hits, 81.8%)<br>Simple_repeat (71hits, 1.29%)<br>Low_complexity (39hits, 0.557%)                                    | 45S_rDNA/25S_rDNA (1294 hits 84.2%)                                                                                                                                                                                                    |    | 2.7320                                                                                | 6.380  |       |
| 48 | <a href="#">CL48</a> | 225750 1505 | 0.215 | 15.40 | Not available | Not available | LTR.Gypsy (1401hits, 84.6%)<br>LTR.Copia. (11hits, 0.275%)<br>Low_complexity (8hits, 0.205%)<br>Simple_repeat (7hits, 0.13%)  | Ty3-INT Ty3/gypsy Athila (471 hits 31.3%)<br>Ty3-RT Ty3/gypsy Athila (329 hits 21.9%)<br>Ty3-RH Ty3/gypsy Athila (174 hits 11.6%)                                                                                                      | organelle/mitochondria (2 hits 0.133%)                                                |  | 0.0939 | 0.532 |
| 49 | <a href="#">CL49</a> | 223050 1487 | 0.212 | 15.60 | Not available | Not available | LTR.Gypsy (231hits, 9.46%)<br>Simple_repeat (105hits, 1.91%)<br>Low_complexity (45hits, 1.04%)                                | LINE-ENDO NA NA (1 hits 0.0672%)<br>Ty3-INT Ty3/gypsy Athila (1 hits 0.0672%)                                                                                                                                                          |  | 0.7380                                                                                | 7.196  |       |
| 50 | <a href="#">CL50</a> | 220350 1469 | 0.210 | 15.80 | Not available | Not available | Low_complexity (22hits, 0.379%)<br>Simple_repeat (20hits, 0.344%)                                                             | organelle/plastid (1599 hits 109%)<br>organelle/mitochondria (1 hits 0.0681%)                                                                                                                                                          |  | 0.5189                                                                                | 2.042  |       |
| 51 | <a href="#">CL51</a> | 218550 1457 | 0.208 | 16.00 | Not available | Not available | Simple_repeat (195hits, 4.87%)<br>LTR.Gypsy (23hits, 0.933%)<br>LINE.L1 (20hits, 0.906%)<br>Low_complexity (12hits, 0.31%)    |                                                                                                                                                                                                                                        | organelle/plastid (1353 hits 92.9%)<br>organelle/mitochondria (143 hits 9.81%)        |  | 0.6990 | 2.128 |
| 52 | <a href="#">CL52</a> | 215100 1434 | 0.205 | 16.20 | Not available | Not available | LTR.Copia (1128hits, 71.9%)<br>Simple_repeat (19hits, 0.328%)<br>LTR.Gypsy (14hits, 0.182%)<br>Low_complexity (7hits, 0.127%) | Ty1-INT Ty1/copia AleII (526 hits 36.7%)<br>Ty1-GAG Ty1/copia AleII (119 hits 8.3%)<br>Ty1-PROT Ty1/copia AleII (100 hits 6.97%)<br>Ty1-PROT Ty1/copia Maximus/SIRE (9 hits 0.628%)<br>Ty1-INT Ty1/copia AleI/Retrofit (1 hits 0.072%) |                                                                                       |  | 0.0943 | 0.558 |
|    |                      |             |       |       |               |               | LTR.Gypsy (623hits, 34.9%)<br>Simple_repeat (17hits, 0.277%)                                                                  | Ty3-GAG Ty3/gypsy Athila (209 hits 14.6%)                                                                                                                                                                                              |  |                                                                                       |        |       |

|    |                      |             |       |       |               |               |                                                                                                                                                                                                                           |                                                                                                                                                                                                                                                                                                             |                                                                                      |                                                                                       |         |        |
|----|----------------------|-------------|-------|-------|---------------|---------------|---------------------------------------------------------------------------------------------------------------------------------------------------------------------------------------------------------------------------|-------------------------------------------------------------------------------------------------------------------------------------------------------------------------------------------------------------------------------------------------------------------------------------------------------------|--------------------------------------------------------------------------------------|---------------------------------------------------------------------------------------|---------|--------|
| 53 | <a href="#">CL53</a> | 214350 1429 | 0.204 | 16.40 | Not available | Not available | Low_complexity (7hits, 0.167%)<br>LTR.Copia (3hits, 0.0569%)<br><br>LTR.Copia (96hits, 6.01%)<br>LTR.Gypsy (35hits, 1.51%)<br>rRNA (12hits, 0.328%)<br>Simple_repeat (16hits, 0.282%)<br>Low_complexity (1hits, 0.0145%)  | Ty3-RT Ty1/copia<br>Athila (149 hits 10.4%)<br>DTA-CD1 NA NA (1 hits 0.07%)<br><br>Ty1-RT Ty1/copia Tork (44 hits 3.09%)<br>Ty1-RH Ty1/copia Tork (19 hits 1.33%)<br>Ty3-INT Ty3/gypsy chromovirus (16 hits 1.12%)<br>Ty3-RT Ty3/gypsy Ogre/Tat (5 hits 0.351%)<br>Ty1-RT Ty1/copia Angela (1 hits 0.0702%) | organelle/mitochondria (996 hits 69.9%)<br>organelle/plastid (8 hits 0.561%)         |     | 0.1036  | 0.490  |
| 54 | <a href="#">CL54</a> | 213750 1425 | 0.204 | 16.60 | Not available | Not available | Simple_repeat (21hits, 0.682%)<br>LTR.Copia (8hits, 0.157%)                                                                                                                                                               | organelle/plastid (1341 hits 96.3%)<br>organelle/mitochondria (22 hits 1.58%)                                                                                                                                                                                                                               |   | 0.0770                                                                                | 0.421   |        |
| 55 | <a href="#">CL55</a> | 208950 1393 | 0.199 | 16.80 | Not available | Not available | Simple_repeat (21hits, 0.682%)<br>LTR.Copia (8hits, 0.157%)                                                                                                                                                               | organelle/plastid (1341 hits 96.3%)<br>organelle/mitochondria (22 hits 1.58%)                                                                                                                                                                                                                               |   | 0.5524                                                                                | 2.584   |        |
| 56 | <a href="#">CL56</a> | 208650 1391 | 0.199 | 17.00 | Not available | Not available | LTR.Gypsy (212hits, 8.6%)<br>LTR.Copia (73hits, 1.83%)<br>Simple_repeat (33hits, 0.928%)<br>Low_complexity (26hits, 0.785%)<br>LTR (13hits, 0.61%)<br>DNA.MULE.MuDR (13hits, 0.215%)<br>LINE.L1 (1hits, 0.0273%)<br>..... | Ty3-GAG Ty3/gypsy<br>Athila (86 hits 6.18%)                                                                                                                                                                                                                                                                 | organelle/plastid (2770 hits 200%)<br>organelle/mitochondria (2 hits 0.145%)         |    | 0.1283  | 1.078  |
| 57 | <a href="#">CL57</a> | 207450 1383 | 0.198 | 17.20 | Not available | Not available | LTR.Copia (247hits, 13.6%)<br>rRNA (199hits, 8.49%)<br>Simple_repeat (3hits, 0.067%)                                                                                                                                      | organelle/plastid (2770 hits 200%)<br>organelle/mitochondria (2 hits 0.145%)                                                                                                                                                                                                                                |  | 1.5600                                                                                | 4.772   |        |
| 58 | <a href="#">CL58</a> | 205500 1370 | 0.196 | 17.40 | Not available | Not available | Simple_repeat (155hits, 2.78%)<br>LTR.Copia (73hits, 1.8%)<br>Low_complexity (4hits, 0.0618%)                                                                                                                             |                                                                                                                                                                                                                                                                                                             |                                                                                      |  | 2.1300  | 7.372  |
| 59 | <a href="#">CL59</a> | 203550 1357 | 0.194 | 17.60 | Not available | Not available | LTR.Copia (100hits, 4.87%)<br>Simple_repeat (31hits, 0.93%)<br>Low_complexity (6hits, 0.167%)<br>LTR.Gypsy (1hits, 0.0197%)                                                                                               | Ty1-GAG Ty1/copia Ivana/Oryco (1 hits 0.0737%)<br>Ty1-RT Ty1/copia AleII (1 hits 0.0737%)                                                                                                                                                                                                                   | organelle/plastid (1366 hits 101%)<br>organelle/mitochondria (17 hits 1.25%)         |  | 0.5066  | 2.137  |
| 60 | <a href="#">CL60</a> | 197550 1317 | 0.188 | 17.80 | Not available | Not available | Simple_repeat (156hits, 4.49%)<br>Low_complexity (51hits, 1.4%)                                                                                                                                                           |                                                                                                                                                                                                                                                                                                             | organelle/plastid (1037 hits 78.7%)<br>organelle/mitochondria (49 hits 3.72%)        |  | 0.5939  | 1.822  |
| 61 | <a href="#">CL61</a> | 194100 1294 | 0.185 | 18.00 | Not available | Not available | LTR.Copia (334hits, 16.1%)<br>Simple_repeat (258hits, 8.99%)<br>LTR.Gypsy (8hits, 0.361%)                                                                                                                                 | Ty1-RH Ty1/copia Angela (29 hits 2.24%)<br>Ty1-RT Ty1/copia AleII (2 hits 0.155%)<br>DTM-CD1 NA NA (1 hits 0.0773%)<br>Ty1-INT Ty1/copia Angela (1 hits 0.0773%)<br>Ty1-INT Ty1/copia Tork (1 hits 0.0773%)<br>Ty1-RT Ty1/co.....                                                                           | organelle/plastid (2723 hits 211%)<br>organelle/mitochondria (47 hits 3.64%)         |  | 11.9200 | 37.560 |
| 62 | <a href="#">CL62</a> | 193800 1292 | 0.185 | 18.20 | Not available | Not available | Simple_repeat (116hits, 2.72%)                                                                                                                                                                                            | Ty1-RT Ty1/copia AleII (1 hits 0.0774%)                                                                                                                                                                                                                                                                     | organelle/plastid (2723 hits 211%)<br>organelle/mitochondria (47 hits 3.64%)         |  | 2.5190  | 6.579  |

|    |                      |             |       |       |               |               |                                                                                                                                                   |                                                                                                                                                                                                                                   |                                                                                       |                                                                                       |        |       |
|----|----------------------|-------------|-------|-------|---------------|---------------|---------------------------------------------------------------------------------------------------------------------------------------------------|-----------------------------------------------------------------------------------------------------------------------------------------------------------------------------------------------------------------------------------|---------------------------------------------------------------------------------------|---------------------------------------------------------------------------------------|--------|-------|
| 63 | <a href="#">CL63</a> | 193350 1289 | 0.184 | 18.40 | Not available | Not available | rRNA ( <b>1288hits</b> , <b>98.5%</b> )                                                                                                           | 45S_rDNA/25S_rDNA (1261 hits 97.8%)                                                                                                                                                                                               |     | 4.2860                                                                                | 11.790 |       |
| 64 | <a href="#">CL64</a> | 193200 1288 | 0.184 | 18.50 | Not available | Not available | Simple_repeat (123hits, 2.39%)<br>Low_complexity (44hits, 0.822%)                                                                                 | organelle/plastid (1097 hits 85.2%)<br>organelle/mitochondria (115 hits 8.93%)                                                                                                                                                    |    | 0.7449                                                                                | 2.484  |       |
| 65 | <a href="#">CL65</a> | 188850 1259 | 0.180 | 18.70 | Not available | Not available | DNA.MULE.MuDR ( <b>73hits</b> , <b>3.19%</b> )<br>LTR.Copia (14hits, 0.686%)<br>Low_complexity (17hits, 0.342%)<br>Simple_repeat (2hits, 0.0381%) | organelle/plastid (1215 hits 96.5%)<br>organelle/mitochondria (11 hits 0.874%)                                                                                                                                                    |    | 1.0380                                                                                | 3.018  |       |
| 66 | <a href="#">CL66</a> | 185850 1239 | 0.177 | 18.90 | Not available | Not available | LTR.Copia (47hits, 2.14%)<br>Simple_repeat (59hits, 1.22%)<br>Low_complexity (2hits, 0.127%)                                                      | organelle/plastid (1148 hits 92.7%)<br>organelle/mitochondria (53 hits 4.28%)                                                                                                                                                     |    | 0.6555                                                                                | 3.632  |       |
| 67 | <a href="#">CL67</a> | 185100 1234 | 0.176 | 19.10 | Not available | Not available | Simple_repeat (27hits, 0.496%)                                                                                                                    | organelle/plastid (1417 hits 115%)                                                                                                                                                                                                |    | 1.1850                                                                                | 3.566  |       |
| 68 | <a href="#">CL68</a> | 183600 1224 | 0.175 | 19.30 | Not available | Not available | LINE-RT NA NA (2 hits 0.163%)                                                                                                                     | organelle/plastid (2458 hits 201%)<br>organelle/mitochondria (1 hits 0.0817%)                                                                                                                                                     |   | 2.0660                                                                                | 7.516  |       |
| 69 | <a href="#">CL69</a> | 181050 1207 | 0.172 | 19.40 | Not available | Not available |                                                                                                                                                   | organelle/plastid (2412 hits 200%)                                                                                                                                                                                                |  | 2.9340                                                                                | 7.374  |       |
| 70 | <a href="#">CL70</a> | 180450 1203 | 0.172 | 19.60 | Not available | Not available |                                                                                                                                                   | organelle/plastid (1204 hits 100%)                                                                                                                                                                                                |  | 0.7950                                                                                | 2.743  |       |
| 71 | <a href="#">CL71</a> | 177600 1184 | 0.169 | 19.80 | Not available | Not available | LTR.Gypsy ( <b>223hits</b> , <b>12.2%</b> )<br>Simple_repeat (36hits, 1.03%)<br>Low_complexity (22hits, 0.681%)<br>LTR.Copia (2hits, 0.0586%)     | Ty1-RT Ty1/copia Angela (1 hits 0.0845%)<br>Ty3-INT Ty3/gypsy Athila (1 hits 0.0845%)                                                                                                                                             |  | 0.4563                                                                                | 3.378  |       |
| 72 | <a href="#">CL72</a> | 175650 1171 | 0.167 | 19.90 | Not available | Not available | LTR.Gypsy ( <b>582hits</b> , <b>44%</b> )<br>Low_complexity (53hits, 2.18%)<br>Simple_repeat (60hits, 2.05%)<br>LTR.Copia (3hits, 0.13%)          | Ty3-INT Ty3/gypsy chromovirus (139 hits 11.9%)<br>Ty3-RT Ty3/gypsy chromovirus (123 hits 10.5%)<br>Ty3-GAG Ty3/gypsy chromovirus (117 hits 9.99%)<br>Ty3-RH Ty3/gypsy chromovirus (45 hits 3.84%)<br>Ty3-PROT Ty3/gypsy chro..... | organelle/mitochondria (2 hits 0.171%)                                                |  | 0.0176 | 0.085 |



|    |                      |             |       |       |               |               |                                                                                                                                           |                                                                                                                                                                                                                                   |                                                                                       |        |        |
|----|----------------------|-------------|-------|-------|---------------|---------------|-------------------------------------------------------------------------------------------------------------------------------------------|-----------------------------------------------------------------------------------------------------------------------------------------------------------------------------------------------------------------------------------|---------------------------------------------------------------------------------------|--------|--------|
| 73 | <a href="#">CL73</a> | 174300 1162 | 0.166 | 20.10 | Not available | Not available | RC.Helitron ( <b>107hits, 6.98%</b> )                                                                                                     | organelle/plastid (1187 hits 102%)                                                                                                                                                                                                |     | 1.0260 | 3.442  |
| 74 | <a href="#">CL74</a> | 172950 1153 | 0.165 | 20.30 | Not available | Not available | Low_complexity (10hits, 0.317%)<br>Simple_repeat (10hits, 0.304%)                                                                         | organelle/plastid (1207 hits 105%)                                                                                                                                                                                                |    | 0.6096 | 2.082  |
| 75 | <a href="#">CL75</a> | 172800 1152 | 0.165 | 20.40 | Not available | Not available | Simple_repeat (100hits, 2.88%)<br>Low_complexity (64hits, 2.24%)<br>LTR.Gypsy (3hits, 0.111%)                                             | organelle/plastid (2298 hits 200%)<br>organelle/mitochondria (3 hits 0.261%)                                                                                                                                                      |    | 4.0000 | 16.320 |
| 76 | <a href="#">CL76</a> | 172650 1151 | 0.164 | 20.60 | Not available | Not available | Simple_repeat (46hits, 1.1%)<br>Low_complexity (1hits, 0.0423%)<br>tRNA (1hits, 0.0376%)                                                  | organelle/plastid (975 hits 86%)<br>organelle/mitochondria (168 hits 14.8%)                                                                                                                                                       |    | 1.3610 | 5.560  |
| 77 | <a href="#">CL77</a> | 170100 1134 | 0.162 | 20.80 | Not available | Not available | LTR.Copia (5hits, 0.106%)                                                                                                                 | organelle/plastid (2269 hits 201%)                                                                                                                                                                                                |    | 0.7505 | 3.175  |
| 78 | <a href="#">CL78</a> | 169200 1128 | 0.161 | 20.90 | Not available | Not available | LTR.Copia ( <b>319hits, 18.3%</b> )                                                                                                       | organelle/plastid (1039 hits 93.8%)<br>organelle/mitochondria (17 hits 1.53%)                                                                                                                                                     |  | 1.7400 | 4.965  |
| 79 | <a href="#">CL79</a> | 166200 1108 | 0.158 | 21.10 | Not available | Not available | DNA.hAT.Ac ( <b>47hits, 3.55%</b> )<br>Low_complexity (21hits, 0.481%)<br>Simple_repeat (12hits, 0.288%)                                  | organelle/plastid (2211 hits 200%)<br>organelle/mitochondria (1 hits 0.0903%)                                                                                                                                                     |  | 1.1150 | 3.610  |
| 80 | <a href="#">CL80</a> | 166200 1108 | 0.158 | 21.20 | Not available | Not available | Simple_repeat (2hits, 0.0403%)                                                                                                            | organelle/plastid (114 hits 101%)                                                                                                                                                                                                 |  | 2.6390 | 7.852  |
| 81 | <a href="#">CL81</a> | 164850 1099 | 0.157 | 21.40 | Not available | Not available | LTR.Copia ( <b>109hits, 7.69%</b> )<br>DNA.CMC.EnSpm (21hits, 0.835%)<br>LTR.Gypsy (4hits, 0.159%)<br>Simple_repeat (2hits, 0.0388%)      | Ty1-RT Ty1/copia unclass(AleI/Retrofit) (18 hits 1.64%)<br>Ty1-RH Ty1/copia unclass(AleI/Retrofit) (13 hits 1.18%)<br>Ty1-RT Ty1/copia AleII (13 hits 1.18%)<br>Ty1-RH Ty1/copia Ivana/Oryco (12 hits 1.09%)<br>Ty1-RT Ty1/c..... |  | 0.0209 | 0.091  |
| 82 | <a href="#">CL82</a> | 162150 1081 | 0.154 | 21.50 | Not available | Not available | LTR.Copia ( <b>677hits, 58.5%</b> )<br>Simple_repeat (9hits, 0.194%)<br>Low_complexity (4hits, 0.17%)<br>LTR.Gypsy (1hits, 0.0234%)       | Ty1-RT Ty1/copia Angela (109 hits 10.1%)<br>Ty1-INT Ty1/copia Angela (102 hits 9.44%)<br>Ty1-RH Ty1/copia Angela (77 hits 7.12%)<br>Ty1-PROT Ty1/copia Angela (39 hits 3.61%)<br>Ty1-RT Ty1/copia Tork (11 hits 1.02%)<br>Ty..... |  | 0.0326 | 0.278  |
| 83 | <a href="#">CL83</a> | 160500 1070 | 0.153 | 21.70 | Not available | Not available | LTR.Copia ( <b>243hits, 18.1%</b> )<br>Simple_repeat ( <b>111hits, 3.2%</b> )<br>Low_complexity (26hits, 0.629%)<br>tRNA (1hits, 0.0349%) | organelle/plastid (1140 hits 107%)                                                                                                                                                                                                |  | 0.4642 | 1.776  |

|    |                      |             |       |       |               |               |                                                                                                                                                                                                                                                                                                                                                    |                                                                                                                                 |                                                                                       |        |       |
|----|----------------------|-------------|-------|-------|---------------|---------------|----------------------------------------------------------------------------------------------------------------------------------------------------------------------------------------------------------------------------------------------------------------------------------------------------------------------------------------------------|---------------------------------------------------------------------------------------------------------------------------------|---------------------------------------------------------------------------------------|--------|-------|
| 84 | <a href="#">CL84</a> | 158850 1059 | 0.151 | 21.90 | Not available | Not available | LTR.Copia (3hits, 0.124%)                                                                                                                                                                                                                                                                                                                          | organelle/plastid (2363 hits 223%)                                                                                              |     | 2.1890 | 7.932 |
| 85 | <a href="#">CL85</a> | 156750 1045 | 0.149 | 22.00 | Not available | Not available | Simple_repeat (43hits, 1%)<br>Low_complexity (15hits, 0.445%)                                                                                                                                                                                                                                                                                      | organelle/plastid (1048 hits 100%)<br>organelle/mitochondria (19 hits 1.82%)                                                    |    | 0.6549 | 2.679 |
| 86 | <a href="#">CL86</a> | 156150 1041 | 0.149 | 22.10 | Not available | Not available | Simple_repeat (31hits, 1.09%)                                                                                                                                                                                                                                                                                                                      | organelle/plastid (1016 hits 97.6%)                                                                                             |    | 0.6719 | 1.921 |
| 87 | <a href="#">CL87</a> | 156000 1040 | 0.149 | 22.30 | Not available | Not available | LTR.Copia ( <b>793hits, 70.5%</b> )<br>Simple_repeat (18hits, 0.432%)<br>Low_complexity (1hits, 0.0231%)<br>Ty1-RT Ty1/copia Angela (251 hits 24.1%)<br>Ty1-RH Ty1/copia Angela (108 hits 10.4%)<br>Ty1-INT Ty1/copia Angela (70 hits 6.73%)<br>Ty3-INT Ty3/gypsy chromovirus (9 hits 0.865%)<br>Ty1-RT Ty1/copia Tork (6 hits 0.577%)             | organelle/plastid (1012 hits 101%)                                                                                              |    | 0.2604 | 1.346 |
| 88 | <a href="#">CL88</a> | 149850 999  | 0.143 | 22.40 | Not available | Not available | Simple_repeat ( <b>126hits, 3.54%</b> )<br>Low_complexity (20hits, 0.543%)                                                                                                                                                                                                                                                                         | organelle/plastid (1012 hits 101%)                                                                                              |   | 0.8456 | 2.703 |
| 89 | <a href="#">CL89</a> | 149100 994  | 0.142 | 22.60 | Not available | Not available | rRNA ( <b>720hits, 67.1%</b> )<br>Simple_repeat (3hits, 0.0711%)                                                                                                                                                                                                                                                                                   | DTM-CD1 NA NA (48 hits 4.83%)<br>45S_rDNA/25S_rDNA (632 hits 63.6%)<br>45S_rDNA/5.8S_rDNA (131 hits 13.2%)                      |  | 3.8020 | 7.847 |
| 90 | <a href="#">CL90</a> | 148950 993  | 0.142 | 22.70 | Not available | Not available | LTR.Gypsy ( <b>328hits, 19.3%</b> )<br>Simple_repeat ( <b>137hits, 4.51%</b> )<br>Low_complexity (71hits, 2.76%)<br>LTR.Copia (1hits, 0.0369%)                                                                                                                                                                                                     | organelle/plastid (895 hits 91.8%)<br>organelle/mitochondria (14 hits 1.44%)                                                    |  | 0.1556 | 2.316 |
| 91 | <a href="#">CL91</a> | 146250 975  | 0.139 | 22.90 | Not available | Not available | Simple_repeat (72hits, 1.96%)<br>RC.Helitron (41hits, 1.8%)<br>Low_complexity (1hits, 0.0403%)<br>LTR.Copia (1hits, 0.0274%)                                                                                                                                                                                                                       | organelle/plastid (895 hits 91.8%)<br>organelle/mitochondria (14 hits 1.44%)                                                    |  | 0.6367 | 1.949 |
| 92 | <a href="#">CL92</a> | 145500 970  | 0.139 | 23.00 | Not available | Not available | rRNA ( <b>153hits, 9.44%</b> )                                                                                                                                                                                                                                                                                                                     | Ty1-INT Ty1/copia AleI/Retrofit (1 hits 0.103%)<br>organelle/plastid (1936 hits 200%)<br>organelle/mitochondria (5 hits 0.515%) |  | 2.2630 | 6.598 |
| 93 | <a href="#">CL93</a> | 144300 962  | 0.137 | 23.10 | Not available | Not available | LTR.Copia ( <b>874hits, 84.3%</b> )<br>Simple_repeat (11hits, 0.272%)<br>Low_complexity (1hits, 0.0347%)<br>LTR.Gypsy (1hits, 0.0173%)<br>Ty1-RT Ty1/copia AleII (350 hits 36.4%)<br>Ty1-RH Ty1/copia AleII (204 hits 21.2%)<br>Ty1-RT Ty1/copia Ivana/Oryco (7 hits 0.728%)<br>Ty1-RT Ty1/copia AleI/Retrofit (2 hits 0.208%)<br>Tv1-RH Tv1/copia | organelle/mitochondria (21 hits 2.18%)                                                                                          |  | 0.2842 | 0.936 |

|     |                       |            |       |       |               |               |                                                                                                                                                                                        |                                                                                                                                                                                                                                   |                                                                                       |                                                                                       |        |       |
|-----|-----------------------|------------|-------|-------|---------------|---------------|----------------------------------------------------------------------------------------------------------------------------------------------------------------------------------------|-----------------------------------------------------------------------------------------------------------------------------------------------------------------------------------------------------------------------------------|---------------------------------------------------------------------------------------|---------------------------------------------------------------------------------------|--------|-------|
| 94  | <a href="#">CL94</a>  | 142800 952 | 0.136 | 23.30 | Not available | Not available | Low_complexity (38hits, 1.09%)<br>Simple_repeat (32hits, 0.917%)                                                                                                                       | organelle/plastid (1000 hits 105%)                                                                                                                                                                                                |    | 0.7796                                                                                | 4.097  |       |
| 95  | <a href="#">CL95</a>  | 142500 950 | 0.136 | 23.40 | Not available | Not available | Simple_repeat (41hits, 1.61%)                                                                                                                                                          |                                                                                                                                                                                                                                   |    | 1.2260                                                                                | 11.260 |       |
| 96  | <a href="#">CL96</a>  | 138300 922 | 0.132 | 23.50 | Not available | Not available |                                                                                                                                                                                        | organelle/plastid (916 hits 99.3%)                                                                                                                                                                                                |    | 1.2670                                                                                | 3.796  |       |
| 97  | <a href="#">CL97</a>  | 136050 907 | 0.130 | 23.70 | Not available | Not available | LTR.Gypsy (487hits, 48.6%)<br>Simple_repeat (33hits, 0.915%)<br>Low_complexity (4hits, 0.143%)<br>LTR.Copia (2hits, 0.0897%)<br>LTR (1hits, 0.0353%)<br>LTR.Cassandra (1hits, 0.0294%) | Ty3-RT Ty3/gypsy chromovirus (176 hits 19.4%)<br>Ty3-RH Ty3/gypsy chromovirus (105 hits 11.6%)<br>Ty3-PROT Ty3/gypsy chromovirus (18 hits 1.98%)<br>Ty3-INT Ty3/gypsy chromovirus (12 hits 1.32%)<br>LINE-RT NA NA (1 hits 0.11%) |   | 0.0255                                                                                | 0.110  |       |
| 98  | <a href="#">CL98</a>  | 134700 898 | 0.128 | 23.80 | Not available | Not available | LTR.Copia (637hits, 63.1%)<br>LTR.Gypsy (19hits, 1.49%)<br>DNA.TeMar.Tc1 (2hits, 0.172%)<br>LTR.Caulimovirus (1hits, 0.0468%)<br>Simple_repeat (2hits, 0.0319%)                        | Ty1-RT Ty1/copia unclass(AleI/Retrofit) (105 hits 11.7%)<br>Ty1-INT Ty1/copia unclass(AleI/Retrofit) (100 hits 11.1%)<br>Ty1-RH Ty1/copia unclass(AleI/Retrofit) (62 hits 6.9%)<br>Ty1-PROT Ty1/copia unclass(AleI/Retrofit)..... | organelle/mitochondria (26 hits 2.9%)                                                 |  | 0.0000 | 0.000 |
| 99  | <a href="#">CL99</a>  | 130350 869 | 0.124 | 23.90 | Not available | Not available | Simple_repeat (52hits, 2.14%)<br>Low_complexity (5hits, 0.183%)                                                                                                                        | organelle/plastid (874 hits 101%)                                                                                                                                                                                                 |  | 1.4970                                                                                | 4.833  |       |
| 100 | <a href="#">CL100</a> | 129150 861 | 0.123 | 24.00 | Not available | Not available | Simple_repeat (87hits, 5.03%)<br>Low_complexity (16hits, 0.746%)                                                                                                                       | organelle/plastid (704 hits 81.8%)                                                                                                                                                                                                |  | 0.5619                                                                                | 3.368  |       |
| 101 | <a href="#">CL101</a> | 128700 858 | 0.123 | 24.20 | Not available | Not available | Simple_repeat (46hits, 1.46%)<br>Low_complexity (30hits, 0.932%)                                                                                                                       | organelle/plastid (717 hits 83.6%)<br>organelle/mitochondria (175 hits 20.4%)                                                                                                                                                     |  | 0.5202                                                                                | 3.030  |       |
| 102 | <a href="#">CL102</a> | 123900 826 | 0.118 | 24.30 | Not available | Not available | LTR.Copia (725hits, 80.3%)<br>Simple_repeat (1hits, 0.0274%)                                                                                                                           | Ty1-RT Ty1/copia Tork (178 hits 21.5%)<br>Ty1-INT Ty1/copia Tork (162 hits 19.6%)<br>Ty1-RH Ty1/copia Tork (95 hits 11.5%)<br>Ty1-PROT Ty1/copia Tork (41 hits 4.96%)<br>Ty1-RT Ty1/copia AleII (8 hits 0.969%)<br>Ty1-PROT ..... |  | 0.0965                                                                                | 0.605  |       |

|     |                       |            |       |       |               |               |                                                                  |                                                                                                                                                                                                                                   |                                                                                       |                                                                                     |        |       |
|-----|-----------------------|------------|-------|-------|---------------|---------------|------------------------------------------------------------------|-----------------------------------------------------------------------------------------------------------------------------------------------------------------------------------------------------------------------------------|---------------------------------------------------------------------------------------|-------------------------------------------------------------------------------------|--------|-------|
| 103 | <a href="#">CL103</a> | 122250 815 | 0.116 | 24.40 | Not available | Not available | Simple_repeat (90hits, 1.83%)<br>LTR.Copia (1hits, 0.0278%)      | organelle/plastid (1732 hits 213%)                                                                                                                                                                                                |     | 2.5740                                                                              | 8.834  |       |
| 104 | <a href="#">CL104</a> | 121650 811 | 0.116 | 24.50 | Not available | Not available | Simple_repeat (22hits, 0.734%)<br>Low_complexity (5hits, 0.225%) | organelle/plastid (771 hits 95.1%)<br>organelle/mitochondria (39 hits 4.81%)                                                                                                                                                      |    | 1.1430                                                                              | 4.192  |       |
| 105 | <a href="#">CL105</a> | 120600 804 | 0.115 | 24.60 | Not available | Not available | LTR.Gypsy (480hits, 49.9%)<br>LTR.Copia. (19hits, 0.915%)        | Ty3-PROT Ty3/gypsy Athila (118 hits 14.7%)<br>Ty3-RT Ty3/gypsy Athila (40 hits 4.98%)<br>Ty3-INT Ty3/gypsy Athila (37 hits 4.6%)                                                                                                  |    | 0.2294                                                                              | 1.493  |       |
| 106 | <a href="#">CL106</a> | 118500 790 | 0.113 | 24.70 | Not available | Not available | Simple_repeat (10hits, 0.603%)                                   | organelle/plastid (786 hits 99.5%)<br>organelle/mitochondria (42 hits 5.32%)                                                                                                                                                      |    | 0.6284                                                                              | 2.532  |       |
| 107 | <a href="#">CL107</a> | 117450 783 | 0.112 | 24.90 | Not available | Not available | Simple_repeat (62hits, 2.25%)<br>Low_complexity (1hits, 0.046%)  | LINE-RT NA NA (26 hits 3.32%)                                                                                                                                                                                                     | organelle/plastid (803 hits 103%)                                                     |  | 1.1770 | 5.364 |
| 108 | <a href="#">CL108</a> | 117450 783 | 0.112 | 25.00 | Not available | Not available | LTR.Copia (689hits, 83.2%)<br>Simple_repeat (7hits, 0.279%)      | Ty1-RT Ty1/copia Angela (125 hits 16%)<br>Ty1-INT Ty1/copia Angela (74 hits 9.45%)<br>Ty1-RH Ty1/copia Angela (64 hits 8.17%)<br>Ty1-GAG Ty1/copia Angela (45 hits 5.75%)<br>Ty1-PROT Ty1/copia Angela (30 hits 3.83%)<br>Ty..... |    | 0.0216                                                                              | 0.128  |       |
| 109 | <a href="#">CL109</a> | 111300 742 | 0.106 | 25.10 | Not available | Not available | Simple_repeat (1hits, 0.0422%)                                   | organelle/plastid (741 hits 99.9%)                                                                                                                                                                                                |  | 1.2700                                                                              | 4.178  |       |
| 110 | <a href="#">CL110</a> | 109650 731 | 0.104 | 25.20 | Not available | Not available | Simple_repeat (46hits, 3.05%)                                    | organelle/plastid (668 hits 91.4%)                                                                                                                                                                                                |  | 0.6818                                                                              | 2.326  |       |
| 111 | <a href="#">CL111</a> | 109050 727 | 0.104 | 25.30 | Not available | Not available | Simple_repeat (85hits, 3.29%)<br>Low_complexity (3hits, 0.157%)  | organelle/plastid (709 hits 97.5%)                                                                                                                                                                                                |  | 0.9741                                                                              | 5.227  |       |
| 112 | <a href="#">CL112</a> | 107700 718 | 0.103 | 25.40 | Not available | Not available | LTR.Copia (588hits, 76.4%)<br>Simple_repeat (31hits, 4.0%)       | Ty1-INT Ty1/copia Angela (131 hits 18.2%)<br>Ty1-GAG Ty1/copia Angela (92 hits 12.8%)<br>Ty1-PROT Ty1/copia Angela (33 hits 4.6%)                                                                                                 |  | 0.4244                                                                              | 1.532  |       |

|     |                       |        |     |       |       |                                                    |               |                                                                                                                                                                                                                   |                                                                                                                                                                                                                                    |                                                                              |                                                                                       |        |        |
|-----|-----------------------|--------|-----|-------|-------|----------------------------------------------------|---------------|-------------------------------------------------------------------------------------------------------------------------------------------------------------------------------------------------------------------|------------------------------------------------------------------------------------------------------------------------------------------------------------------------------------------------------------------------------------|------------------------------------------------------------------------------|---------------------------------------------------------------------------------------|--------|--------|
|     |                       |        |     |       |       | available 1.35%)<br>Low_complexity (4hits, 0.214%) |               | Ty1-PROT Ty1/copia TAR (30 hits 4.18%)<br>Ty1-INT Ty1/copia AleII (5 hits 0.696%)<br>Ty1.....                                                                                                                     | 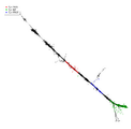                                                                                                                                                 |                                                                              |                                                                                       |        |        |
| 113 | <a href="#">CL113</a> | 106500 | 710 | 0.101 | 25.50 | Not available                                      | Not available | LTR.Copia ( <b>548hits, 68.8%</b> )<br>Low_complexity (1hits, 0.0479%)                                                                                                                                            | Ty1-INT Ty1/copia AleII (216 hits 30.4%)<br>Ty1-GAG Ty1/copia AleII (108 hits 15.2%)<br>Ty1-PROT Ty1/copia AleII (55 hits 7.75%)<br>Ty1-PROT Ty1/copia Ivana/Oryco (1 hits 0.141%)<br>Ty1-PROT Ty1/copia Maximus/SIRE (1 hit.....) | organelle/plastid (1 hits 0.141%)                                            |    | 0.1642 | 0.563  |
| 114 | <a href="#">CL114</a> | 99300  | 662 | 0.095 | 25.60 | Not available                                      | Not available | Simple_repeat (66hits, 2.79%)<br>Low_complexity (5hits, 0.254%)                                                                                                                                                   |                                                                                                                                                                                                                                    | organelle/plastid (590 hits 89.1%)<br>organelle/mitochondria (65 hits 9.82%) |    | 0.5980 | 4.532  |
| 115 | <a href="#">CL115</a> | 98850  | 659 | 0.094 | 25.70 | Not available                                      | Not available | LTR.Gypsy ( <b>203hits, 13.3%</b> )<br>RC.Helitron (1hits, 0.0607%)<br>Simple_repeat (1hits, 0.0486%)                                                                                                             |                                                                                                                                                                                                                                    |                                                                              |    | 1.9700 | 12.140 |
| 116 | <a href="#">CL116</a> | 98850  | 659 | 0.094 | 25.80 | Not available                                      | Not available | Simple_repeat (49hits, 1.87%)<br>LTR.Copia (12hits, 0.909%)<br>DNA.hAT.Tag1 (2hits, 0.18%)<br>LTR.Gypsy (1hits, 0.0931%)<br>Low_complexity (1hits, 0.0395%)                                                       |                                                                                                                                                                                                                                    |                                                                              |    | 0.0000 | 0.000  |
| 117 | <a href="#">CL117</a> | 97500  | 650 | 0.093 | 25.90 | Not available                                      | Not available | LTR.Copia ( <b>373hits, 49%</b> )<br>LTR.Gypsy ( <b>101hits, 11.3%</b> )<br>Simple_repeat (43hits, 1.37%)<br>LTR.Caulimovirus (3hits, 0.211%)<br>DNA.TeMar.Tc1 (1hits, 0.103%)<br>Low_complexity (1hits, 0.0656%) | Ty1-INT Ty1/copia unclass(AleI/Retrofit) (99 hits 15.2%)<br>Ty1-PROT Ty1/copia unclass(AleI/Retrofit) (26 hits 4%)<br>Ty1-RT Ty1/copia Ivana/Oryco (19 hits 2.92%)<br>Ty1-GAG Ty1/copia AleI/Retrofit (17 hits 2.62%)<br>Ty1.....  | organelle/mitochondria (1 hits 0.154%)                                       |  | 0.0000 | 0.000  |
| 118 | <a href="#">CL118</a> | 97200  | 648 | 0.093 | 26.00 | Not available                                      | Not available | RC.Helitron (29hits, 2.81%)                                                                                                                                                                                       | DTC-CD1 NA NA (1 hits 0.154%)                                                                                                                                                                                                      | organelle/plastid (626 hits 96.6%)<br>organelle/mitochondria (9 hits 1.39%)  |  | 1.4300 | 5.401  |
| 119 | <a href="#">CL119</a> | 96000  | 640 | 0.091 | 26.10 | Not available                                      | Not available | DNA.MULE.MuDR ( <b>115hits, 14.7%</b> )<br>Low_complexity (2hits, 0.0938%)<br>Simple_repeat (1hits, 0.0323%)                                                                                                      | DTM-CD1 NA NA (196 hits 30.6%)<br>DTC-CD1 NA NA (2 hits 0.312%)                                                                                                                                                                    |                                                                              |  | 0.0000 | 0.000  |
| 120 | <a href="#">CL120</a> | 95700  | 638 | 0.091 | 26.10 | Not available                                      | Not available | DNA.PIF.Harbinger (20hits, 1.89%)<br>Simple_repeat (28hits, 1.18%)<br>Low_complexity (25hits, 1.14%)<br>LTR.Copia (2hits, 0.132%)                                                                                 | Ty1-INT Ty1/copia AleII (1 hits 0.157%)                                                                                                                                                                                            |                                                                              |  | 0.0000 | 0.000  |
| 121 | <a href="#">CL121</a> | 94650  | 631 | 0.090 | 26.20 | Not available                                      | Not available | LTR.Copia (14hits, 1.06%)<br>LTR.Gypsy (11hits, 0.827%)<br>Simple_repeat (18hits, 0.558%)<br>Low_complexity (4hits, 0.278%)                                                                                       | Ty1-RH Ty1/copia AleII (3 hits 0.475%)                                                                                                                                                                                             | organelle/mitochondria (492 hits 78%)                                        |  | 0.0000 | 0.000  |

|     |                       |       |     |       |       |               |               |                                                                                                                                                             |                                                                                                                                                                                                                                                 |                                                                                       |        |       |
|-----|-----------------------|-------|-----|-------|-------|---------------|---------------|-------------------------------------------------------------------------------------------------------------------------------------------------------------|-------------------------------------------------------------------------------------------------------------------------------------------------------------------------------------------------------------------------------------------------|---------------------------------------------------------------------------------------|--------|-------|
| 122 | <a href="#">CL122</a> | 93750 | 625 | 0.089 | 26.30 | Not available | Not available | LTR.Gypsy (147hits, 8.45%)<br>Simple_repeat (29hits, 1.42%)<br>Low_complexity (9hits, 0.458%)<br>LTR.Copia (2hits, 0.109%)<br>rRNA (1hits, 0.0309%)         |                                                                                                                                                                                                                                                 | 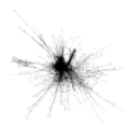   | 2.4430 | 7.520 |
| 123 | <a href="#">CL123</a> | 88500 | 590 | 0.084 | 26.40 | Not available | Not available | LTR.Gypsy (15hits, 1.03%)<br>Simple_repeat (14hits, 0.493%)<br>Low_complexity (2hits, 0.0701%)<br>LTR.Copia (1hits, 0.0475%)                                | Ty1-RT Ty1/copia<br>Angela (1 hits 0.169%)                                                                                                                                                                                                      |    | 2.0750 | 6.949 |
| 124 | <a href="#">CL124</a> | 86850 | 579 | 0.083 | 26.50 | Not available | Not available | LTR.Copia (4hits, 0.216%)<br>Simple_repeat (2hits, 0.061%)<br>LTR.Gypsy (1hits, 0.0391%)                                                                    | Ty1-INT Ty1/copia<br>AleII (1 hits 0.173%)                                                                                                                                                                                                      |    | 2.1820 | 5.181 |
| 125 | <a href="#">CL125</a> | 84150 | 561 | 0.080 | 26.60 | Not available | Not available | LTR.Copia (362hits, 54.1%)<br>Simple_repeat (2hits, 0.0428%)<br>DNA.hAT.Tag1 (1hits, 0.0368%)                                                               | Ty1-INT Ty1/copia<br>Angela (121 hits 21.6%)<br>Ty1-RT Ty1/copia<br>Angela (40 hits 7.13%)<br>Ty1-INT Ty1/copia<br>AleII (10 hits 1.78%)<br>Ty1-INT Ty1/copia<br>Ivana/Oryco (2 hits 0.357%)<br>Ty1-RT Ty1/copia<br>Ivana/Oryco (1 hits 0.178%) |    | 2.0040 | 6.952 |
| 126 | <a href="#">CL126</a> | 83850 | 559 | 0.080 | 26.60 | Not available | Not available | Simple_repeat (49hits, 1.7%)<br>Low_complexity (7hits, 0.329%)<br>LTR.Copia (1hits, 0.0489%)                                                                |                                                                                                                                                                                                                                                 |    | 0.0000 | 0.000 |
| 127 | <a href="#">CL127</a> | 82350 | 549 | 0.078 | 26.70 | Not available | Not available | LTR.Gypsy (21hits, 2.75%)<br>Simple_repeat (5hits, 0.225%)<br>Low_complexity (2hits, 0.0959%)                                                               | Ty3-INT Ty3/gypsy<br>chromovirus (34 hits 6.19%)                                                                                                                                                                                                |  | 0.0000 | 0.000 |
| 128 | <a href="#">CL128</a> | 76650 | 511 | 0.073 | 26.80 | Not available | Not available | Simple_repeat (39hits, 1.66%)<br>LTR (3hits, 0.364%)<br>Low_complexity (4hits, 0.307%)<br>LTR.Copia (4hits, 0.223%)<br>LTR.Gypsy (2hits, 0.181%)            |                                                                                                                                                                                                                                                 |  | 0.0000 | 0.000 |
| 129 | <a href="#">CL129</a> | 75450 | 503 | 0.072 | 26.90 | Not available | Not available | Simple_repeat (41hits, 2.74%)<br>Low_complexity (24hits, 1.6%)<br>LTR.Gypsy (11hits, 1.08%)<br>LTR.Copia (1hits, 0.0782%)<br>DNA.MULE.MuDR (1hits, 0.0557%) | DTM-CD1 NA NA (1 hits 0.199%)                                                                                                                                                                                                                   |  | 1.1360 | 2.982 |
| 130 | <a href="#">CL130</a> | 74250 | 495 | 0.071 | 26.90 | Not available | Not available | Simple_repeat (500hits, 92.2%)<br>Low_complexity (9hits, 0.514%)<br>LINE.L1 (1hits, 0.191%)                                                                 | organelle/plastid (10 hits 2.02%)                                                                                                                                                                                                               |  | 0.0000 | 0.000 |
| 131 | <a href="#">CL131</a> | 73650 | 491 | 0.070 | 27.00 | Not available | Not available | LTR.Gypsy (156hits, 22.9%)<br>LTR.Copia (4hits, 0.266%)                                                                                                     | Ty3-GAG Ty3/gypsy<br>Athila (159 hits 32.4%)<br>Ty1-GAG Ty1/copia<br>AleII (1 hits 0.204%)                                                                                                                                                      |  | 1.4090 | 4.277 |

|     |                       |       |     |       |       |               |               |                                                                                                                                                                                           |                                                                                                                                                                             |                                                                              |  |        |       |
|-----|-----------------------|-------|-----|-------|-------|---------------|---------------|-------------------------------------------------------------------------------------------------------------------------------------------------------------------------------------------|-----------------------------------------------------------------------------------------------------------------------------------------------------------------------------|------------------------------------------------------------------------------|--|--------|-------|
| 132 | <a href="#">CL132</a> | 71250 | 475 | 0.068 | 27.10 | Not available | Not available | Simple_repeat (80hits, 5.59%)<br>Low_complexity (44hits, 4.16%)<br>LTR.Gypsy (1hits, 0.0407%)                                                                                             |                                                                                                                                                                             |                                                                              |  | 0.6136 | 3.368 |
| 133 | <a href="#">CL133</a> | 70200 | 468 | 0.067 | 27.10 | Not available | Not available | LTR.Gypsy (101hits, 19.8%)<br>rRNA (35hits, 3.97%)<br>LTR.Copia (13hits, 2.36%)<br>DNA.TcMar.Stowaway (14hits, 1.34%)<br>DNA.CMC.EnSpm (12hits, 0.775%)<br>Low_complexity (3hits, 0.175%) | Ty3-INT Ty3/gypsy chromovirus (61 hits 13%)<br>Ty3-CHDII Ty3/gypsy chromovirus (12 hits 2.56%)                                                                              | organelle/mitochondria (457 hits 97.6%)                                      |  | 0.0437 | 0.214 |
| 134 | <a href="#">CL134</a> | 69150 | 461 | 0.066 | 27.20 | Not available | Not available | LTR.Gypsy (19hits, 2.73%)                                                                                                                                                                 | Ty3-GAG Ty3/gypsy Ogre/Tat (15 hits 3.25%)                                                                                                                                  | organelle/mitochondria (149 hits 32.3%)                                      |  | 0.0000 | 0.000 |
| 135 | <a href="#">CL135</a> | 68550 | 457 | 0.065 | 27.30 | Not available | Not available | LTR.Copia (386hits, 66.3%)<br>LTR (43hits, 3.51%)<br>LTR.Gypsy (4hits, 0.443%)<br>LTR.Cassandra (5hits, 0.324%)<br>Simple_repeat (2hits, 0.0992%)                                         | Ty1-RH Ty1/copia Tork (49 hits 10.7%)<br>Ty1-RT Ty1/copia Tork (23 hits 5.03%)<br>Ty1-GAG Ty1/copia Tork (16 hits 3.5%)<br>Ty1-PROT Ty1/copia AleI/Retrofit (1 hits 0.219%) | organelle/mitochondria (16 hits 3.5%)                                        |  | 0.0000 | 0.000 |
| 136 | <a href="#">CL136</a> | 67350 | 449 | 0.064 | 27.30 | Not available | Not available | Simple_repeat (4hits, 0.226%)<br>RC.Helitron (2hits, 0.137%)                                                                                                                              |                                                                                                                                                                             | organelle/mitochondria (353 hits 78.6%)                                      |  | 0.2198 | 1.336 |
| 137 | <a href="#">CL137</a> | 65850 | 439 | 0.063 | 27.40 | Not available | Not available | DNA.MULE.MuDR (164hits, 29.8%)<br>Simple_repeat (4hits, 0.199%)<br>Low_complexity (1hits, 0.0683%)                                                                                        | DTM-CD1 NA NA (218 hits 49.7%)                                                                                                                                              |                                                                              |  | 0.0000 | 0.000 |
| 138 | <a href="#">CL138</a> | 64950 | 433 | 0.062 | 27.50 | Not available | Not available | LINE.L1 (200hits, 39.2%)<br>Simple_repeat (5hits, 0.209%)<br>LTR.Gypsy (1hits, 0.125%)<br>Low_complexity (1hits, 0.0693%)                                                                 | LINE-RT NA NA (107 hits 24.7%)                                                                                                                                              |                                                                              |  | 0.0000 | 0.000 |
| 139 | <a href="#">CL139</a> | 62250 | 415 | 0.059 | 27.50 | Not available | Not available | Simple_repeat (54hits, 5.35%)<br>Low_complexity (19hits, 2.23%)                                                                                                                           |                                                                                                                                                                             |                                                                              |  | 0.3570 | 3.373 |
| 140 | <a href="#">CL140</a> | 60300 | 402 | 0.057 | 27.60 | Not available | Not available | LTR.Copia (216hits, 50.8%)                                                                                                                                                                | Ty1-RT Ty1/copia Tork (114 hits 28.4%)<br>Ty1-INT Ty1/copia Tork (34 hits 8.46%)<br>Ty1-RH Ty1/copia Tork (28 hits 6.97%)                                                   | organelle/mitochondria (51 hits 12.7%)                                       |  | 0.0000 | 0.000 |
| 141 | <a href="#">CL141</a> | 57150 | 381 | 0.054 | 27.60 | Not available | Not available | LTR.Copia (6hits, 0.49%)<br>Simple_repeat (1hits, 0.098%)                                                                                                                                 |                                                                                                                                                                             | organelle/mitochondria (153 hits 40.2%)<br>organelle/plastid (64 hits 16.8%) |  | 0.0000 | 0.000 |
| 142 | <a href="#">CL142</a> | 56100 | 374 | 0.053 | 27.70 | Not available | Not available | Simple_repeat (12hits, 0.524%)                                                                                                                                                            |                                                                                                                                                                             | organelle/mitochondria (416 hits 111%)                                       |  | 0.0000 | 0.000 |

|     |                       |       |     |       |       |               |               |                                                                                                  |                                                                                                                                                                                                                                   |                                                                                       |                                                                                       |        |        |
|-----|-----------------------|-------|-----|-------|-------|---------------|---------------|--------------------------------------------------------------------------------------------------|-----------------------------------------------------------------------------------------------------------------------------------------------------------------------------------------------------------------------------------|---------------------------------------------------------------------------------------|---------------------------------------------------------------------------------------|--------|--------|
| 143 | <a href="#">CL143</a> | 56100 | 374 | 0.053 | 27.70 | Not available | Not available | LTR.Copia (9hits, 0.544%)                                                                        | organelle/mitochondria (160 hits 42.8%)                                                                                                                                                                                           |     | 0.0425                                                                                | 0.267  |        |
| 144 | <a href="#">CL144</a> | 55350 | 369 | 0.053 | 27.80 | Not available | Not available | Simple_repeat (9hits, 0.58%)<br>Low_complexity (1hits, 0.0488%)                                  |                                                                                                                                                                                                                                   |    | 0.0000                                                                                | 0.000  |        |
| 145 | <a href="#">CL145</a> | 52800 | 352 | 0.050 | 27.80 | Not available | Not available | Low_complexity (1hits, 0.0625%)                                                                  | Ty3-GAG Ty3/gypsy OGRE/Tat (3 hits 0.852%)<br>DTA-CD1 NA NA (1 hits 0.284%)                                                                                                                                                       | organelle/mitochondria (266 hits 75.6%)                                               |    | 0.0000 | 0.000  |
| 146 | <a href="#">CL146</a> | 51150 | 341 | 0.049 | 27.90 | Not available | Not available | LTR.Gypsy (59hits, 13.1%)<br>Simple_repeat (9hits, 0.739%)<br>Low_complexity (5hits, 0.514%)     |                                                                                                                                                                                                                                   |    | 0.0000                                                                                | 0.000  |        |
| 147 | <a href="#">CL147</a> | 50100 | 334 | 0.048 | 27.90 | Not available | Not available | DNA.MULE.MuDR (11hits, 1.36%)<br>Simple_repeat (13hits, 1.12%)<br>Low_complexity (6hits, 0.469%) |                                                                                                                                                                                                                                   |    | 0.0000                                                                                | 0.000  |        |
| 148 | <a href="#">CL148</a> | 49800 | 332 | 0.047 | 28.00 | Not available | Not available | Simple_repeat (12hits, 0.773%)                                                                   | Ty3-RH Ty3/gypsy chromovirus (39 hits 11.7%)<br>Ty3-RT Ty3/gypsy chromovirus (37 hits 11.1%)<br>Ty3-INT Ty3/gypsy chromovirus (35 hits 10.5%)                                                                                     | organelle/mitochondria (15 hits 4.52%)                                                |   | 0.0961 | 0.602  |
| 149 | <a href="#">CL149</a> | 47250 | 315 | 0.045 | 28.00 | Not available | Not available | Simple_repeat (9hits, 0.586%)<br>Low_complexity (4hits, 0.337%)<br>DNA.MULE.MuDR (1hits, 0.135%) |                                                                                                                                                                                                                                   |  | 0.0000                                                                                | 0.000  |        |
| 150 | <a href="#">CL150</a> | 45150 | 301 | 0.043 | 28.10 | Not available | Not available | Simple_repeat (7hits, 0.525%)<br>Low_complexity (1hits, 0.0753%)                                 | Ty1-INT Ty1/copia TAR (63 hits 20.9%)<br>Ty1-GAG Ty1/copia TAR (19 hits 6.31%)<br>Ty1-INT Ty1/copia Angela (4 hits 1.33%)<br>Ty1-PROT Ty1/copia AleII (4 hits 1.33%)<br>Ty1-PROT Ty1/copia TAR (3 hits 0.997%)<br>Ty1-INT Ty..... |                                                                                       |  | 0.0000 | 0.000  |
| 151 | <a href="#">CL151</a> | 45000 | 300 | 0.043 | 28.10 | Not available | Not available | Simple_repeat (25hits, 3.71%)<br>Low_complexity (10hits, 1.07%)                                  |                                                                                                                                                                                                                                   | organelle/plastid (301 hits 100%)                                                     |  | 1.6360 | 11.000 |
| 152 | <a href="#">CL152</a> | 44400 | 296 | 0.042 | 28.20 | Not available | Not available | Low_complexity (3hits, 0.338%)<br>Simple_repeat (3hits, 0.282%)                                  |                                                                                                                                                                                                                                   |                                                                                       |  | 0.0000 | 0.000  |
| 153 | <a href="#">CL153</a> | 43350 | 289 | 0.041 | 28.20 | Not available | Not available | Satellite (82hits, 15.8%)<br>Simple_repeat (1hits, 0.0554%)                                      |                                                                                                                                                                                                                                   | 5S_rDNA/5S_rDNA (83 hits 28.7%)                                                       |  | 0.0000 | 0.000  |



|     |                       |       |     |       |       |               |               |                                                                                                   |                                                                                                                                                                                                                                                    |                                                                                       |        |       |
|-----|-----------------------|-------|-----|-------|-------|---------------|---------------|---------------------------------------------------------------------------------------------------|----------------------------------------------------------------------------------------------------------------------------------------------------------------------------------------------------------------------------------------------------|---------------------------------------------------------------------------------------|--------|-------|
| 154 | <a href="#">CL154</a> | 43200 | 288 | 0.041 | 28.20 | Not available | Not available | Simple_repeat (81hits, 18.2%)<br>Low_complexity (6hits, 0.699%)                                   | organelle/plastid (10 hits 3.47%)                                                                                                                                                                                                                  |    | 0.2681 | 0.347 |
| 155 | <a href="#">CL155</a> | 41700 | 278 | 0.040 | 28.30 | Not available | Not available | LTR.Copia (222hits, 75%)<br>Low_complexity (5hits, 0.513%)<br>Simple_repeat (2hits, 0.223%)       | Ty1-RT Ty1/copia TAR (67 hits 24.1%)<br>Ty1-RH Ty1/copia TAR (31 hits 11.2%)<br>Ty1-RT Ty1/copia Ivana/Oryco (3 hits 1.08%)<br>Ty1-RT Ty1/copia AleI/Retrofit (2 hits 0.719%)<br>Ty1-RT Ty1/copia AleII (2 hits 0.719%)                            |    | 0.2035 | 0.719 |
| 156 | <a href="#">CL156</a> | 39000 | 260 | 0.037 | 28.30 | Not available | Not available | DNA.hAT.Ac (106hits, 33.7%)<br>DNA.PIF.Harbinger (1hits, 0.221%)<br>Simple_repeat (2hits, 0.105%) | DTA-CD1 NA NA (88 hits 33.8%)<br>organelle/mitochondria (1 hits 0.385%)                                                                                                                                                                            |    | 0.0000 | 0.000 |
| 157 | <a href="#">CL157</a> | 37650 | 251 | 0.036 | 28.40 | Not available | Not available |                                                                                                   | organelle/mitochondria (293 hits 117%)                                                                                                                                                                                                             |    | 0.0596 | 0.398 |
| 158 | <a href="#">CL158</a> | 37050 | 247 | 0.035 | 28.40 | Not available | Not available | LTR.Gypsy (217hits, 81.6%)<br>Simple_repeat (4hits, 0.494%)<br>Low_complexity (1hits, 0.154%)     | Ty3-INT Ty3/gypsy chromovirus (145 hits 58.7%)<br>Ty3-CHDII Ty3/gypsy chromovirus (19 hits 7.69%)<br>Ty3-RH Ty3/gypsy chromovirus (2 hits 0.81%)                                                                                                   |   | 0.0000 | 0.000 |
| 159 | <a href="#">CL159</a> | 36600 | 244 | 0.035 | 28.40 | Not available | Not available | LTR.Copia (86hits, 27.9%)<br>DNA.CMC.EnSpm (9hits, 0.959%)                                        | Ty1-GAG Ty1/copia AleII (33 hits 13.5%)<br>Ty1-RH Ty1/copia AleII (27 hits 11.1%)<br>organelle/mitochondria (176 hits 72.1%)                                                                                                                       |  | 0.0000 | 0.000 |
| 160 | <a href="#">CL160</a> | 34500 | 230 | 0.033 | 28.50 | Not available | Not available | LTR.Gypsy (19hits, 6.25%)                                                                         | Ty3-GAG Ty3/gypsy chromovirus (16 hits 6.96%)<br>Ty3-PROT Ty3/gypsy Ogr/Tat (5 hits 2.17%)<br>organelle/mitochondria (78 hits 33.9%)                                                                                                               |  | 0.0000 | 0.000 |
| 161 | <a href="#">CL161</a> | 34050 | 227 | 0.032 | 28.50 | Not available | Not available | LTR.Gypsy (38hits, 12.4%)<br>Low_complexity (1hits, 0.106%)                                       |                                                                                                                                                                                                                                                    |  | 1.0930 | 1.762 |
| 162 | <a href="#">CL162</a> | 34050 | 227 | 0.032 | 28.50 | Not available | Not available | Simple_repeat (3hits, 0.256%)                                                                     | organelle/mitochondria (81 hits 35.7%)                                                                                                                                                                                                             |  | 0.1168 | 0.441 |
| 163 | <a href="#">CL163</a> | 33750 | 225 | 0.032 | 28.60 | Not available | Not available | LTR.Copia (220hits, 91.2%)<br>DNA.hAT.Tip100 (1hits, 0.21%)                                       | Ty1-INT Ty1/copia TAR (91 hits 40.4%)<br>Ty1-PROT Ty1/copia TAR (31 hits 13.8%)<br>Ty1-PROT Ty1/copia AleII (4 hits 1.78%)<br>Ty1-PROT Ty1/copia Tork (2 hits 0.889%)<br>Ty1-INT Ty1/copia Angela (1 hits 0.444%)<br>Simple_repeat (12hits, 2.71%) |  | 0.3018 | 1.333 |

|     |                       |       |     |       |       |               |               |                                                                                                                     |                                                                                              |                                                                                       |        |       |
|-----|-----------------------|-------|-----|-------|-------|---------------|---------------|---------------------------------------------------------------------------------------------------------------------|----------------------------------------------------------------------------------------------|---------------------------------------------------------------------------------------|--------|-------|
| 164 | <a href="#">CL164</a> | 33450 | 223 | 0.032 | 28.60 | Not available | Not available | Low_complexity (3hits, 0.601%)<br>DNA.MULE.MuDR (1hits, 0.389%)<br>LTR (1hits, 0.152%)<br>LTR.Copia (1hits, 0.123%) | Ty3-GAG Ty3/gypsy chromovirus (1 hits 0.448%)                                                | 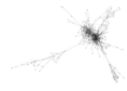    | 0.0000 | 0.000 |
| 165 | <a href="#">CL165</a> | 32700 | 218 | 0.031 | 28.60 | Not available | Not available | LTR.Gypsy (12hits, 4.66%)<br>Simple_repeat (1hits, 0.116%)                                                          | Ty3-RT Ty3/gypsy organelle/mitochondria (31 hits 14.2%)<br>Ogre/Tat (9 hits 4.13%)           |    | 0.0000 | 0.000 |
| 166 | <a href="#">CL166</a> | 32550 | 217 | 0.031 | 28.70 | Not available | Not available | LTR.Gypsy (35hits, 8.17%)<br>LTR.Copia. (13hits, 2.25%)<br>LTR (1hits, 0.298%)<br>Low_complexity (1hits, 0.144%)    |                                                                                              |    | 0.9852 | 2.304 |
| 167 | <a href="#">CL167</a> | 31500 | 210 | 0.030 | 28.70 | Not available | Not available | LTR.Gypsy (45hits, 16.5%)<br>Simple_repeat (5hits, 0.578%)<br>Low_complexity (1hits, 0.124%)                        |                                                                                              |    | 0.0000 | 0.000 |
| 168 | <a href="#">CL168</a> | 31050 | 207 | 0.030 | 28.70 | Not available | Not available | Simple_repeat (9hits, 1.83%)<br>Low_complexity (1hits, 0.129%)                                                      |                                                                                              |    | 0.0000 | 0.000 |
| 169 | <a href="#">CL169</a> | 30900 | 206 | 0.029 | 28.70 | Not available | Not available | LTR.Copia (178hits, 78.1%)<br>Simple_repeat (4hits, 0.505%)                                                         | Ty1-INT Ty1/copia Bianca (103 hits 50%)<br>Ty1-PROT Ty1/copia Bianca (23 hits 11.2%)         |    | 0.0000 | 0.000 |
| 170 | <a href="#">CL170</a> | 29700 | 198 | 0.028 | 28.80 | Not available | Not available | Simple_repeat (4hits, 0.455%)                                                                                       | organelle/mitochondria (218 hits 110%)                                                       |  | 0.0000 | 0.000 |
| 171 | <a href="#">CL171</a> | 29250 | 195 | 0.028 | 28.80 | Not available | Not available | LINE.L1 (68hits, 27.9%)<br>Low_complexity (1hits, 0.154%)<br>Simple_repeat (2hits, 0.13%)                           |                                                                                              |  | 0.0000 | 0.000 |
| 172 | <a href="#">CL172</a> | 29100 | 194 | 0.028 | 28.80 | Not available | Not available | Simple_repeat (1hits, 0.0928%)                                                                                      | organelle/mitochondria (217 hits 112%)                                                       |  | 0.0000 | 0.000 |
| 173 | <a href="#">CL173</a> | 28650 | 191 | 0.027 | 28.90 | Not available | Not available | LTR.Copia (193hits, 95.8%)                                                                                          | Ty1-RT Ty1/copia Ivana/Oryco (93 hits 48.7%)<br>Ty1-RH Ty1/copia Ivana/Oryco (62 hits 32.5%) |  | 0.0000 | 0.000 |
| 174 | <a href="#">CL174</a> | 28200 | 188 | 0.027 | 28.90 | Not available | Not available | LTR.Copia (3hits, 0.649%)                                                                                           | organelle/mitochondria (115 hits 61.2%)                                                      |  | 0.0000 | 0.000 |
| 175 | <a href="#">CL175</a> | 27900 | 186 | 0.027 | 28.90 | Not available | Not available | Simple_repeat (4hits, 0.717%)<br>Low_complexity (2hits, 0.28%)                                                      | organelle/mitochondria (104 hits 55.9%)                                                      |  | 0.0000 | 0.000 |

LTR.Copia (47hits,

|     |                       |       |     |       |       |               |               |                                                                                                                               |                                                                                                                            |                                                                                    |                                                                                       |        |        |
|-----|-----------------------|-------|-----|-------|-------|---------------|---------------|-------------------------------------------------------------------------------------------------------------------------------|----------------------------------------------------------------------------------------------------------------------------|------------------------------------------------------------------------------------|---------------------------------------------------------------------------------------|--------|--------|
| 176 | <a href="#">CL176</a> | 26850 | 179 | 0.026 | 28.90 | Not available | Not available | LTR.Copia (9 hits, 20.9%)<br>LTR.Gypsy (2 hits, 0.484%)<br>Low_complexity (1 hits, 0.153%)<br>Simple_repeat (1 hits, 0.13%)   | Ty1-INT Ty1/copia AleII (1 hits 0.559%)                                                                                    |  | 0.1015                                                                                | 0.559  |        |
| 177 | <a href="#">CL177</a> | 26700 | 178 | 0.025 | 29.00 | Not available | Not available | LTR.Copia (138 hits, 72.6%)                                                                                                   | Ty1-INT Ty1/copia Tork (56 hits 31.5%)<br>Ty1-PROT Ty1/copia Tork (49 hits 27.5%)<br>Ty1-GAG Ty1/copia Tork (5 hits 2.81%) | organelle/mitochondria (17 hits 9.55%)                                             |    | 0.0000 | 0.000  |
| 178 | <a href="#">CL178</a> | 26400 | 176 | 0.025 | 29.00 | Not available | Not available | Simple_repeat (4 hits, 0.78%)                                                                                                 |                                                                                                                            |                                                                                    |    | 0.0000 | 0.000  |
| 179 | <a href="#">CL179</a> | 25800 | 172 | 0.025 | 29.00 | Not available | Not available | LTR.Copia (15 hits, 5.4%)                                                                                                     |                                                                                                                            | organelle/mitochondria (6 hits 3.49%)                                              |    | 0.0000 | 0.000  |
| 180 | <a href="#">CL180</a> | 25500 | 170 | 0.024 | 29.00 | Not available | Not available |                                                                                                                               |                                                                                                                            |                                                                                    |    | 4.7420 | 14.710 |
| 181 | <a href="#">CL181</a> | 25350 | 169 | 0.024 | 29.10 | Not available | Not available | Simple_repeat (41 hits, 10.7%)<br>DNA.hAT.Ac (36 hits, 10.4%)<br>Low_complexity (23 hits, 5.7%)<br>LTR.Copia (11 hits, 3.55%) |                                                                                                                            |                                                                                    |   | 0.0000 | 0.000  |
| 182 | <a href="#">CL182</a> | 25050 | 167 | 0.024 | 29.10 | Not available | Not available | Low_complexity (6 hits, 0.766%)<br>Simple_repeat (1 hits, 0.0758%)                                                            |                                                                                                                            | organelle/mitochondria (100 hits 59.9%)                                            |  | 0.0000 | 0.000  |
| 183 | <a href="#">CL183</a> | 24900 | 166 | 0.024 | 29.10 | Not available | Not available | Simple_repeat (1 hits, 0.145%)                                                                                                |                                                                                                                            | organelle/mitochondria (179 hits 108%)                                             |  | 0.0000 | 0.000  |
| 184 | <a href="#">CL184</a> | 24750 | 165 | 0.024 | 29.10 | Not available | Not available | LTR.Copia (146 hits, 71.8%)                                                                                                   | Ty1-GAG Ty1/copia Tork (28 hits 17%)<br>Ty1-RH Ty1/copia AleII (1 hits 0.606%)                                             |                                                                                    |  | 0.0000 | 0.000  |
| 185 | <a href="#">CL185</a> | 24150 | 161 | 0.023 | 29.20 | Not available | Not available | LTR.Copia (123 hits, 64.4%)<br>Simple_repeat (3 hits, 0.211%)                                                                 | Ty1-INT Ty1/copia Ivana/Oryco (64 hits 39.8%)<br>Ty1-PROT Ty1/copia Ivana/Oryco (21 hits 13%)                              |                                                                                    |  | 0.0000 | 0.000  |
| 186 | <a href="#">CL186</a> | 24000 | 160 | 0.023 | 29.20 | Not available | Not available | DNA.CMC.EnSpm (74 hits, 39.9%)<br>Simple_repeat (7 hits, 1.25%)                                                               |                                                                                                                            |                                                                                    |  | 0.0000 | 0.000  |

|     |                       |       |     |       |       |               |               |                                                                                             |                                                                                                                                                                                                                            |                                                                                     |                                                                                       |        |       |
|-----|-----------------------|-------|-----|-------|-------|---------------|---------------|---------------------------------------------------------------------------------------------|----------------------------------------------------------------------------------------------------------------------------------------------------------------------------------------------------------------------------|-------------------------------------------------------------------------------------|---------------------------------------------------------------------------------------|--------|-------|
| 187 | <a href="#">CL187</a> | 23550 | 157 | 0.022 | 29.20 | Not available | Not available | LTR.Copia ( <b>48hits</b> , 25.3%)                                                          | Ty1-GAG Ty1/copia AleII (65 hits 41.4%)                                                                                                                                                                                    |  | 0.0000                                                                                | 0.000  |       |
| 188 | <a href="#">CL188</a> | 23250 | 155 | 0.022 | 29.20 | Not available | Not available |                                                                                             |                                                                                                                                                                                                                            | organelle/mitochondria (173 hits 112%)                                              |    | 0.0000 | 0.000 |
| 189 | <a href="#">CL189</a> | 23100 | 154 | 0.022 | 29.20 | Not available | Not available | LTR.Copia ( <b>19hits</b> , 9.65%)                                                          | Ty1-RT Ty1/copia AleII (12 hits 7.79%)<br>Ty3-GAG Ty3/gypsy Ogre/Tat (11 hits 7.14%)<br>Ty1-RT Ty1/copia Ivana/Oryco (4 hits 2.6%)<br>Ty1-RT Ty1/copia TAR (2 hits 1.3%)<br>Ty1-RT Ty1/copia AleI/Retrofit (1 hits 0.649%) | organelle/mitochondria (57 hits 37%)                                                |    | 0.0000 | 0.000 |
| 190 | <a href="#">CL190</a> | 22500 | 150 | 0.021 | 29.30 | Not available | Not available | LTR.Gypsy ( <b>79hits</b> , 48.5%)                                                          | Ty3-RH Ty3/gypsy Ogre/Tat (24 hits 16%)<br>Ty3-INT Ty3/gypsy Ogre/Tat (14 hits 9.33%)<br>Ty3-RH Ty3/gypsy Athila (5 hits 3.33%)<br>Ty3-RH Ty3/gypsy chromovirus (3 hits 2%)                                                | organelle/mitochondria (44 hits 29.3%)                                              |   | 0.0000 | 0.000 |
| 191 | <a href="#">CL191</a> | 22200 | 148 | 0.021 | 29.30 | Not available | Not available |                                                                                             |                                                                                                                                                                                                                            | organelle/mitochondria (67 hits 45.3%)                                              |  | 0.0000 | 0.000 |
| 192 | <a href="#">CL192</a> | 21900 | 146 | 0.021 | 29.30 | Not available | Not available |                                                                                             |                                                                                                                                                                                                                            | organelle/mitochondria (90 hits 61.6%)                                              |  | 0.0000 | 0.000 |
| 193 | <a href="#">CL193</a> | 21900 | 146 | 0.021 | 29.30 | Not available | Not available |                                                                                             |                                                                                                                                                                                                                            | organelle/mitochondria (58 hits 39.7%)                                              |  | 0.0000 | 0.000 |
| 194 | <a href="#">CL194</a> | 21900 | 146 | 0.021 | 29.30 | Not available | Not available | Simple_repeat (9hits, 2.15%)<br>LTR.Copia (1hits, 0.247%)<br>Low_complexity (1hits, 0.242%) |                                                                                                                                                                                                                            |                                                                                     |  | 0.1821 | 0.685 |
| 195 | <a href="#">CL195</a> | 21600 | 144 | 0.021 | 29.40 | Not available | Not available | LTR.Gypsy ( <b>142hits</b> , 92.9%)                                                         | Ty3-INT Ty3/gypsy Athila (74 hits 51.4%)<br>Ty3-RH Ty3/gypsy Athila (27 hits 18.8%)                                                                                                                                        |                                                                                     |  | 0.0000 | 0.000 |

|     |                       |       |     |       |       |               |               |                                                                                          |                                                                                                |                                        |        |        |       |
|-----|-----------------------|-------|-----|-------|-------|---------------|---------------|------------------------------------------------------------------------------------------|------------------------------------------------------------------------------------------------|----------------------------------------|--------|--------|-------|
| 196 | <a href="#">CL196</a> | 21600 | 144 | 0.021 | 29.40 | Not available | Not available |                                                                                          | organelle/mitochondria (154 hits 107%)                                                         |                                        | 0.1873 | 0.694  |       |
| 197 | <a href="#">CL197</a> | 21450 | 143 | 0.020 | 29.40 | Not available | Not available |                                                                                          | organelle/mitochondria (55 hits 38.5%)                                                         |                                        | 0.0000 | 0.000  |       |
| 198 | <a href="#">CL198</a> | 20700 | 138 | 0.020 | 29.40 | Not available | Not available | Simple_repeat (10hits, 1.06%)                                                            | organelle/mitochondria (138 hits 100%)                                                         |                                        | 0.0000 | 0.000  |       |
| 199 | <a href="#">CL199</a> | 20550 | 137 | 0.020 | 29.40 | Not available | Not available | Simple_repeat (2hits, 0.569%)                                                            |                                                                                                |                                        | 0.5093 | 2.190  |       |
| 200 | <a href="#">CL200</a> | 20400 | 136 | 0.019 | 29.50 | Not available | Not available | LINE.L1 (11hits, 4.24%)                                                                  | LINE-ENDO NA NA (26 organelle/mitochondria hits 19.1%)                                         |                                        | 0.0000 | 0.000  |       |
| 201 | <a href="#">CL201</a> | 20250 | 135 | 0.019 | 29.50 | Not available | Not available |                                                                                          | organelle/mitochondria (93 hits 68.9%)                                                         |                                        | 0.0000 | 0.000  |       |
| 202 | <a href="#">CL202</a> | 20100 | 134 | 0.019 | 29.50 | Not available | Not available | LTR.Gypsy (44hits, 26.2%)<br>Simple_repeat (7hits, 1.18%)                                | Ty3-RT Ty3/gypsy<br>Ogre/Tat (28 hits 20.9%)<br>Ty3-PROT Ty3/gypsy<br>Ogre/Tat (10 hits 7.46%) | organelle/mitochondria (10 hits 7.46%) |        | 0.0000 | 0.000 |
| 203 | <a href="#">CL203</a> | 19950 | 133 | 0.019 | 29.50 | Not available | Not available | LINE.L1 (36hits, 21%)<br>Simple_repeat (2hits, 0.401%)<br>Low_complexity (1hits, 0.165%) |                                                                                                |                                        | 0.0000 | 0.000  |       |
| 204 | <a href="#">CL204</a> | 19950 | 133 | 0.019 | 29.50 | Not available | Not available |                                                                                          | organelle/mitochondria (50 hits 37.6%)                                                         |                                        | 0.0000 | 0.000  |       |
| 205 | <a href="#">CL205</a> | 19800 | 132 | 0.019 | 29.60 | Not available | Not available |                                                                                          | organelle/mitochondria (70 hits 53%)                                                           |                                        | 0.0000 | 0.000  |       |
| 206 | <a href="#">CL206</a> | 19800 | 132 | 0.019 | 29.60 | Not available | Not available | LTR.Copia (49hits, 30.8%)<br>Simple_repeat (16hits, 2.95%)                               | DHH-CD1 NA NA (1 hits 0.758%)                                                                  |                                        | 0.1269 | 0.758  |       |

|     |                       |       |     |       |       |               |               |                                                                                            |                                                                                                                                                                                                                                 |                                                                                       |                                                                                       |        |       |
|-----|-----------------------|-------|-----|-------|-------|---------------|---------------|--------------------------------------------------------------------------------------------|---------------------------------------------------------------------------------------------------------------------------------------------------------------------------------------------------------------------------------|---------------------------------------------------------------------------------------|---------------------------------------------------------------------------------------|--------|-------|
| 207 | <a href="#">CL207</a> | 19800 | 132 | 0.019 | 29.60 | Not available | Not available | LTR.Copia (12hits, 4.28%)                                                                  | organelle/mitochondria (82 hits 62.1%)                                                                                                                                                                                          |     | 0.0000                                                                                | 0.000  |       |
| 208 | <a href="#">CL208</a> | 19800 | 132 | 0.019 | 29.60 | Not available | Not available |                                                                                            | organelle/mitochondria (105 hits 79.5%)                                                                                                                                                                                         |    | 0.0000                                                                                | 0.000  |       |
| 209 | <a href="#">CL209</a> | 19800 | 132 | 0.019 | 29.60 | Not available | Not available | Simple_repeat (14hits, 1.53%)                                                              | organelle/mitochondria (94 hits 71.2%)                                                                                                                                                                                          |    | 0.0000                                                                                | 0.000  |       |
| 210 | <a href="#">CL210</a> | 19800 | 132 | 0.019 | 29.70 | Not available | Not available | LTR.Copia (78hits, 44.5%)<br>Low_complexity (4hits, 1.31%)<br>Simple_repeat (4hits, 1.15%) | Ty1-GAG Ty1/copia Angela (51 hits 38.6%)                                                                                                                                                                                        |    | 2.2040                                                                                | 9.848  |       |
| 211 | <a href="#">CL211</a> | 19650 | 131 | 0.019 | 29.70 | Not available | Not available | LTR.Gypsy (1hits, 0.193%)                                                                  | organelle/mitochondria (83 hits 63.4%)                                                                                                                                                                                          |    | 0.0000                                                                                | 0.000  |       |
| 212 | <a href="#">CL212</a> | 19500 | 130 | 0.019 | 29.70 | Not available | Not available |                                                                                            | organelle/mitochondria (135 hits 104%)                                                                                                                                                                                          |  | 0.0000                                                                                | 0.000  |       |
| 213 | <a href="#">CL213</a> | 19500 | 130 | 0.019 | 29.70 | Not available | Not available | LTR.Copia (18hits, 11.5%)<br>Simple_repeat (7hits, 1.46%)                                  | Ty1-GAG Ty1/copia Angela (8 hits 6.15%)                                                                                                                                                                                         | organelle/mitochondria (107 hits 82.3%)                                               |  | 0.0000 | 0.000 |
| 214 | <a href="#">CL214</a> | 19500 | 130 | 0.019 | 29.70 | Not available | Not available |                                                                                            | organelle/mitochondria (95 hits 73.1%)<br>organelle/plastid (6 hits 4.62%)                                                                                                                                                      |  | 0.3030                                                                                | 1.538  |       |
| 215 | <a href="#">CL215</a> | 19200 | 128 | 0.018 | 29.70 | Not available | Not available | LTR.Copia (58hits, 33.7%)                                                                  | Ty1-INT Ty1/copia AleII (30 hits 23.4%)<br>Ty1-PROT Ty1/copia AleII (8 hits 6.25%)<br>Ty1-PROT Ty1/copia Ivana/Oryco (4 hits 3.12%)<br>Ty1-GAG Ty1/copia AleII (2 hits 1.56%)<br>Ty1-INT Ty1/copia AleI/Retrofit (2 hits 1.56%) |  | 0.0000                                                                                | 0.000  |       |
| 216 | <a href="#">CL216</a> | 19200 | 128 | 0.018 | 29.80 | Not available | Not available | Simple_repeat (9hits, 1.81%)                                                               | organelle/mitochondria (127 hits 99.2%)                                                                                                                                                                                         |  | 0.0000                                                                                | 0.000  |       |

|     |                       |       |     |       |       |               |               |                                                                 |                                                                                                                                                                                                                                                          |                                        |  |        |       |
|-----|-----------------------|-------|-----|-------|-------|---------------|---------------|-----------------------------------------------------------------|----------------------------------------------------------------------------------------------------------------------------------------------------------------------------------------------------------------------------------------------------------|----------------------------------------|--|--------|-------|
| 217 | <a href="#">CL217</a> | 19050 | 127 | 0.018 | 29.80 | Not available | Not available | LTR.Copia (70hits, 46%)                                         | <p>Ty1-RH Ty1/copia AleII (22 hits 17.3%)</p> <p>Ty1-RT Ty1/copia AleII (10 hits 7.87%)</p> <p>Ty1-RT Ty1/copia unclass(Ale) (6 hits 4.72%)</p> <p>Ty1-RH Ty1/copia AleI/Retrofit (5 hits 3.94%)</p> <p>Ty1-RT Ty1/copia Ivana/Oryco (1 hits 0.787%)</p> | organelle/mitochondria (5 hits 3.94%)  |  | 0.0000 | 0.000 |
| 218 | <a href="#">CL218</a> | 19050 | 127 | 0.018 | 29.80 | Not available | Not available | LTR.Gypsy (88hits, 61.1%)                                       | <p>Ty3-PROT Ty3/gypsy Athila (38 hits 29.9%)</p> <p>Ty3-PROT Ty3/gypsy Ogre/Tat (1 hits 0.787%)</p>                                                                                                                                                      |                                        |  | 0.0000 | 0.000 |
| 219 | <a href="#">CL219</a> | 18900 | 126 | 0.018 | 29.80 | Not available | Not available | Simple_repeat (10hits, 0.857%)                                  |                                                                                                                                                                                                                                                          | organelle/mitochondria (92 hits 73%)   |  | 0.0000 | 0.000 |
| 220 | <a href="#">CL220</a> | 18900 | 126 | 0.018 | 29.80 | Not available | Not available | LTR.Copia (10hits, 3.12%)                                       | <p>Ty1-INT Ty1/copia AleII (7 hits 5.56%)</p> <p>Ty1-INT Ty1/copia AleI/Retrofit (1 hits 0.794%)</p>                                                                                                                                                     | organelle/mitochondria (91 hits 72.2%) |  | 0.0000 | 0.000 |
| 221 | <a href="#">CL221</a> | 18750 | 125 | 0.018 | 29.90 | Not available | Not available | Simple_repeat (2hits, 0.272%)                                   |                                                                                                                                                                                                                                                          |                                        |  | 0.0778 | 0.800 |
| 222 | <a href="#">CL222</a> | 18750 | 125 | 0.018 | 29.90 | Not available | Not available |                                                                 |                                                                                                                                                                                                                                                          | organelle/mitochondria (126 hits 101%) |  | 0.0000 | 0.000 |
| 223 | <a href="#">CL223</a> | 18750 | 125 | 0.018 | 29.90 | Not available | Not available |                                                                 |                                                                                                                                                                                                                                                          | organelle/mitochondria (99 hits 79.2%) |  | 0.0000 | 0.000 |
| 224 | <a href="#">CL224</a> | 18750 | 125 | 0.018 | 29.90 | Not available | Not available | LTR.Copia (100hits, 75.6%)                                      | <p>Ty1-RT Ty1/copia AleII (32 hits 25.6%)</p> <p>Ty1-RH Ty1/copia AleII (13 hits 10.4%)</p> <p>Ty1-RH Ty1/copia AleI/Retrofit (10 hits 8%)</p> <p>Ty1-RT Ty1/copia unclass(Ale) (10 hits 8%)</p> <p>Ty1-RH Ty1/copia unclass(Ale) (1 hits 0.8%).....</p> | organelle/mitochondria (8 hits 6.4%)   |  | 0.0000 | 0.000 |
| 225 | <a href="#">CL225</a> | 18450 | 123 | 0.018 | 29.90 | Not available | Not available | Simple_repeat (2hits, 0.672%)<br>Low_complexity (1hits, 0.255%) |                                                                                                                                                                                                                                                          |                                        |  | 0.0000 | 0.000 |

|     |                       |       |     |       |       |               |               |                                                                                                       |                                                                                                                                                                                                                                                  |                                           |        |       |  |
|-----|-----------------------|-------|-----|-------|-------|---------------|---------------|-------------------------------------------------------------------------------------------------------|--------------------------------------------------------------------------------------------------------------------------------------------------------------------------------------------------------------------------------------------------|-------------------------------------------|--------|-------|--|
| 226 | <a href="#">CL226</a> | 18450 | 123 | 0.018 | 29.90 | Not available | Not available |                                                                                                       | organelle/mitochondria<br>(49 hits 39.8%)                                                                                                                                                                                                        | 0.0000                                    | 0.000  |       |  |
| 227 | <a href="#">CL227</a> | 18450 | 123 | 0.018 | 30.00 | Not available | Not available |                                                                                                       | organelle/mitochondria<br>(123 hits 100%)                                                                                                                                                                                                        | 0.0000                                    | 0.000  |       |  |
| 228 | <a href="#">CL228</a> | 18300 | 122 | 0.017 | 30.00 | Not available | Not available | LTR.Gypsy (46hits,<br>27.9%)<br>Simple_repeat (2hits,<br>0.623%)<br>Low_complexity<br>(1hits, 0.251%) |                                                                                                                                                                                                                                                  | 0.7561                                    | 2.459  |       |  |
| 229 | <a href="#">CL229</a> | 18000 | 120 | 0.017 | 30.00 | Not available | Not available | LTR.Copia (104hits,<br>81.2%)<br>Low_complexity<br>(1hits, 0.2%)                                      | Ty1-INT Ty1/copia<br>Angela (39 hits 32.5%)<br>Ty1-RT Ty1/copia<br>Angela (19 hits 15.8%)<br>Ty1-INT Ty1/copia TAR<br>(2 hits 1.67%)<br>Ty1-PROT Ty1/copia<br>Angela (2 hits 1.67%)<br>Ty1-INT Ty1/copia AleII<br>(1 hits 0.833%)<br>Ty1-PR..... | 0.2208                                    | 0.833  |       |  |
| 230 | <a href="#">CL230</a> | 17700 | 118 | 0.017 | 30.00 | Not available | Not available | Simple_repeat (2hits,<br>0.633%)                                                                      |                                                                                                                                                                                                                                                  | 0.0000                                    | 0.000  |       |  |
| 231 | <a href="#">CL231</a> | 17550 | 117 | 0.017 | 30.00 | Not available | Not available | Simple_repeat (13hits,<br>2.74%)<br>LTR.Copia (3hits,<br>0.786%)                                      | organelle/mitochondria<br>(93 hits 79.5%)                                                                                                                                                                                                        | 0.0000                                    | 0.000  |       |  |
| 232 | <a href="#">CL232</a> | 17550 | 117 | 0.017 | 30.00 | Not available | Not available | LINE.L1 (20hits,<br>12.5%)                                                                            |                                                                                                                                                                                                                                                  | 0.0000                                    | 0.000  |       |  |
| 233 | <a href="#">CL233</a> | 17550 | 117 | 0.017 | 30.10 | Not available | Not available |                                                                                                       | organelle/mitochondria<br>(20 hits 17.1%)                                                                                                                                                                                                        | 0.0000                                    | 0.000  |       |  |
| 234 | <a href="#">CL234</a> | 17550 | 117 | 0.017 | 30.10 | Not available | Not available | Simple_repeat (20hits,<br>5.36%)<br>Low_complexity<br>(5hits, 2.13%)                                  |                                                                                                                                                                                                                                                  | 0.0000                                    | 0.000  |       |  |
| 235 | <a href="#">CL235</a> | 17400 | 116 | 0.017 | 30.10 | Not available | Not available | LTR.Gypsy (6hits,<br>4.28%)                                                                           | Ty3-INT Ty3/gypsy<br>Ogre/Tat (14 hits 12.1%)                                                                                                                                                                                                    | organelle/mitochondria<br>(70 hits 60.3%) | 0.0000 | 0.000 |  |
| 236 | <a href="#">CL236</a> | 17400 | 116 | 0.017 | 30.10 | Not available | Not available | Simple_repeat (7hits,<br>1.06%)<br>LTR.Copia (1hits,<br>0.397%)<br>Low_complexity                     |                                                                                                                                                                                                                                                  | 0.2635                                    | 1.724  |       |  |



(1hits, 0.264%)

|     |                       |       |     |       |       |               |               |                         |                              |                                                                                    |        |       |
|-----|-----------------------|-------|-----|-------|-------|---------------|---------------|-------------------------|------------------------------|------------------------------------------------------------------------------------|--------|-------|
| 237 | <a href="#">CL237</a> | 17250 | 115 | 0.016 | 30.10 | Not available | Not available | LINE.L1 (17hits, 10.8%) | DHH-CD2 NA NA (1 hits 0.87%) |  | 0.0000 | 0.000 |
|-----|-----------------------|-------|-----|-------|-------|---------------|---------------|-------------------------|------------------------------|------------------------------------------------------------------------------------|--------|-------|

|     |                       |       |     |       |       |               |               |  |                                        |                                                                                     |        |       |
|-----|-----------------------|-------|-----|-------|-------|---------------|---------------|--|----------------------------------------|-------------------------------------------------------------------------------------|--------|-------|
| 238 | <a href="#">CL238</a> | 17250 | 115 | 0.016 | 30.10 | Not available | Not available |  | organelle/mitochondria (78 hits 67.8%) |  | 0.0000 | 0.000 |
|-----|-----------------------|-------|-----|-------|-------|---------------|---------------|--|----------------------------------------|-------------------------------------------------------------------------------------|--------|-------|

|     |                       |       |     |       |       |               |               |                                                                                                                                                                                      |  |                                                                                     |        |       |
|-----|-----------------------|-------|-----|-------|-------|---------------|---------------|--------------------------------------------------------------------------------------------------------------------------------------------------------------------------------------|--|-------------------------------------------------------------------------------------|--------|-------|
| 239 | <a href="#">CL239</a> | 17100 | 114 | 0.016 | 30.20 | Not available | Not available | LTR.Copia (16hits, 6.67%)<br>LINE.L1 (12hits, 4.56%)<br>Simple_repeat (6hits, 1.29%)<br>Low_complexity (4hits, 0.871%)<br>DNA.MULE.MuDR (1hits, 0.655%)<br>LTR.Gypsy (1hits, 0.175%) |  |  | 0.0000 | 0.000 |
|-----|-----------------------|-------|-----|-------|-------|---------------|---------------|--------------------------------------------------------------------------------------------------------------------------------------------------------------------------------------|--|-------------------------------------------------------------------------------------|--------|-------|

|     |                       |       |     |       |       |               |               |  |                                        |                                                                                      |        |       |
|-----|-----------------------|-------|-----|-------|-------|---------------|---------------|--|----------------------------------------|--------------------------------------------------------------------------------------|--------|-------|
| 240 | <a href="#">CL240</a> | 17100 | 114 | 0.016 | 30.20 | Not available | Not available |  | organelle/mitochondria (61 hits 53.5%) |  | 0.0000 | 0.000 |
|-----|-----------------------|-------|-----|-------|-------|---------------|---------------|--|----------------------------------------|--------------------------------------------------------------------------------------|--------|-------|

|     |                       |       |     |       |       |               |               |  |                                        |                                                                                       |        |       |
|-----|-----------------------|-------|-----|-------|-------|---------------|---------------|--|----------------------------------------|---------------------------------------------------------------------------------------|--------|-------|
| 241 | <a href="#">CL241</a> | 16950 | 113 | 0.016 | 30.20 | Not available | Not available |  | organelle/mitochondria (25 hits 22.1%) |  | 0.0000 | 0.000 |
|-----|-----------------------|-------|-----|-------|-------|---------------|---------------|--|----------------------------------------|---------------------------------------------------------------------------------------|--------|-------|

|     |                       |       |     |       |       |               |               |  |                                        |                                                                                       |        |       |
|-----|-----------------------|-------|-----|-------|-------|---------------|---------------|--|----------------------------------------|---------------------------------------------------------------------------------------|--------|-------|
| 242 | <a href="#">CL242</a> | 16800 | 112 | 0.016 | 30.20 | Not available | Not available |  | organelle/mitochondria (127 hits 113%) |  | 0.0000 | 0.000 |
|-----|-----------------------|-------|-----|-------|-------|---------------|---------------|--|----------------------------------------|---------------------------------------------------------------------------------------|--------|-------|

|     |                       |       |     |       |       |               |               |                                                               |                                                                                                                                                                                                                                   |                                      |                                                                                       |        |       |
|-----|-----------------------|-------|-----|-------|-------|---------------|---------------|---------------------------------------------------------------|-----------------------------------------------------------------------------------------------------------------------------------------------------------------------------------------------------------------------------------|--------------------------------------|---------------------------------------------------------------------------------------|--------|-------|
| 243 | <a href="#">CL243</a> | 16650 | 111 | 0.016 | 30.20 | Not available | Not available | LTR.Caulimovirus (99hits, 82.2%)<br>LTR.Gypsy (1hits, 0.775%) | PARA-RT NA NA (28 hits 25.2%)<br>PARA-RH NA NA (8 hits 7.21%)<br>Ty3-RH Ty3/gypsy Athila (6 hits 5.41%)<br>Ty3-RT Ty3/gypsy chromovirus (6 hits 5.41%)<br>Ty3-RH Ty3/gypsy chromovirus (2 hits 1.8%)<br>Ty1-RH Ty1/copia Iva..... | organelle/mitochondria (3 hits 2.7%) |  | 0.0000 | 0.000 |
|-----|-----------------------|-------|-----|-------|-------|---------------|---------------|---------------------------------------------------------------|-----------------------------------------------------------------------------------------------------------------------------------------------------------------------------------------------------------------------------------|--------------------------------------|---------------------------------------------------------------------------------------|--------|-------|

|     |                       |       |     |       |       |               |               |                            |                                                                                                                                                                       |  |                                                                                       |        |       |
|-----|-----------------------|-------|-----|-------|-------|---------------|---------------|----------------------------|-----------------------------------------------------------------------------------------------------------------------------------------------------------------------|--|---------------------------------------------------------------------------------------|--------|-------|
| 244 | <a href="#">CL244</a> | 16650 | 111 | 0.016 | 30.20 | Not available | Not available | LTR.Copia (111hits, 95.2%) | Ty1-PROT Ty1/copia Angela (17 hits 15.3%)<br>Ty1-INT Ty1/copia Angela (7 hits 6.31%)<br>Ty1-RT Ty1/copia AleII (3 hits 2.7%)<br>Ty1-RT Ty1/copia Angela (2 hits 1.8%) |  | 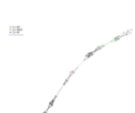 | 0.3937 | 0.901 |
|-----|-----------------------|-------|-----|-------|-------|---------------|---------------|----------------------------|-----------------------------------------------------------------------------------------------------------------------------------------------------------------------|--|---------------------------------------------------------------------------------------|--------|-------|

Simple\_repeat (12hits)

|     |                       |       |     |       |       |               |               |                                                                                            |                                                                                                                                                                             |                                                                                       |                                                                                       |        |       |
|-----|-----------------------|-------|-----|-------|-------|---------------|---------------|--------------------------------------------------------------------------------------------|-----------------------------------------------------------------------------------------------------------------------------------------------------------------------------|---------------------------------------------------------------------------------------|---------------------------------------------------------------------------------------|--------|-------|
| 245 | <a href="#">CL245</a> | 16650 | 111 | 0.016 | 30.30 | Not available | Not available | Simple_repeat (2 hits, 3.6%)<br>Low_complexity (6hits, 2.34%)<br>LTR.Gypsy (1hits, 0.517%) |                                                                                                                                                                             |     | 0.0000                                                                                | 0.000  |       |
| 246 | <a href="#">CL246</a> | 16500 | 110 | 0.016 | 30.30 | Not available | Not available |                                                                                            | organelle/mitochondria (105 hits 95.5%)                                                                                                                                     |    | 0.0000                                                                                | 0.000  |       |
| 247 | <a href="#">CL247</a> | 16500 | 110 | 0.016 | 30.30 | Not available | Not available | LTR.Gypsy (110hits, 96.6%)                                                                 | Ty3-RH Ty3/gypsy chromovirus (55 hits 50%)<br>Ty3-RT Ty3/gypsy chromovirus (29 hits 26.4%)                                                                                  | organelle/mitochondria (1 hits 0.909%)                                                |    | 0.0000 | 0.000 |
| 248 | <a href="#">CL248</a> | 16350 | 109 | 0.016 | 30.30 | Not available | Not available | LTR.Copia (109hits, 97.4%)                                                                 | Ty1-INT Ty1/copia Tork (50 hits 45.9%)<br>Ty1-RT Ty1/copia Tork (12 hits 11%)<br>Ty1-PROT Ty1/copia Tork (4 hits 3.67%)                                                     |                                                                                       |    | 0.0000 | 0.000 |
| 249 | <a href="#">CL249</a> | 15900 | 106 | 0.015 | 30.30 | Not available | Not available |                                                                                            | organelle/mitochondria (80 hits 75.5%)                                                                                                                                      |    | 0.4577                                                                                | 1.887  |       |
| 250 | <a href="#">CL250</a> | 15900 | 106 | 0.015 | 30.30 | Not available | Not available | Simple_repeat (6hits, 1.35%)<br>Low_complexity (4hits, 0.95%)                              | organelle/mitochondria (44 hits 41.5%)                                                                                                                                      |    | 0.0000                                                                                | 0.000  |       |
| 251 | <a href="#">CL251</a> | 15900 | 106 | 0.015 | 30.40 | Not available | Not available | LTR.Copia (68hits, 55.9%)                                                                  | Ty1-RH Ty1/copia Angela (27 hits 25.5%)<br>Ty1-RH Ty1/copia Alel/Retrofit (3 hits 2.83%)<br>Ty1-RT Ty1/copia Angela (3 hits 2.83%)<br>Ty1-RH Ty1/copia Tork (1 hits 0.943%) |                                                                                       |  | 0.2299 | 0.943 |
| 252 | <a href="#">CL252</a> | 15900 | 106 | 0.015 | 30.40 | Not available | Not available | Simple_repeat (25hits, 11.3%)<br>LTR.Gypsy (1hits, 0.83%)                                  |                                                                                                                                                                             |  | 0.0000                                                                                | 0.000  |       |
| 253 | <a href="#">CL253</a> | 15900 | 106 | 0.015 | 30.40 | Not available | Not available |                                                                                            | organelle/mitochondria (13 hits 12.3%)                                                                                                                                      |  | 0.0000                                                                                | 0.000  |       |
| 254 | <a href="#">CL254</a> | 15900 | 106 | 0.015 | 30.40 | Not available | Not available | LTR.Gypsy (30hits, 23.7%)                                                                  | Ty3-RH Ty3/gypsy chromovirus (9 hits 8.49%)<br>Ty3-RT Ty3/gypsy chromovirus (8 hits 7.55%)                                                                                  | organelle/mitochondria (43 hits 40.6%)                                                |  | 0.0000 | 0.000 |
| 255 | <a href="#">CL255</a> | 15900 | 106 | 0.015 | 30.40 | Not available | Not available |                                                                                            | organelle/mitochondria (129 hits 122%)                                                                                                                                      |  | 0.0000                                                                                | 0.000  |       |
| 256 | <a href="#">CL256</a> | 15750 | 105 | 0.015 | 30.40 | Not available | Not available | Simple_repeat (10hits, 1.14%)<br>LINE.L1 (1hits, 0.692%)                                   | LINE-ENDO NA NA (12 hits 11.4%)                                                                                                                                             | organelle/mitochondria (104 hits 99%)                                                 |  | 0.0000 | 0.000 |

|     |                       |       |     |       |       |               |               |                                                                                               |                                                                                                                              |                                        |                                                                                       |        |       |
|-----|-----------------------|-------|-----|-------|-------|---------------|---------------|-----------------------------------------------------------------------------------------------|------------------------------------------------------------------------------------------------------------------------------|----------------------------------------|---------------------------------------------------------------------------------------|--------|-------|
| 257 | <a href="#">CL257</a> | 15750 | 105 | 0.015 | 30.40 | Not available | Not available | Simple_repeat (5hits, 0.73%)                                                                  | DTM-CD1 NA NA (1 hits 0.952%)                                                                                                | organelle/mitochondria (75 hits 71.4%) |    | 0.0000 | 0.000 |
| 258 | <a href="#">CL258</a> | 15600 | 104 | 0.015 | 30.50 | Not available | Not available | LTR.Gypsy (28hits, 19.7%)                                                                     | Ty3-INT Ty3/gypsy chromovirus (24 hits 23.1%)<br>Ty3-RH Ty3/gypsy chromovirus (6 hits 5.77%)                                 | organelle/plastid (10 hits 9.62%)      |    | 0.0000 | 0.000 |
| 259 | <a href="#">CL259</a> | 15600 | 104 | 0.015 | 30.50 | Not available | Not available | LTR.Gypsy (12hits, 6.63%)<br>Simple_repeat (1hits, 0.301%)                                    |                                                                                                                              |                                        |    | 0.0000 | 0.000 |
| 260 | <a href="#">CL260</a> | 15450 | 103 | 0.015 | 30.50 | Not available | Not available | LTR.Gypsy (3hits, 1.26%)<br>Simple_repeat (4hits, 1.1%)<br>Low_complexity (3hits, 0.796%)     | Ty3-PROT Ty3/gypsy Ogre/Tat (6 hits 5.83%)                                                                                   | organelle/mitochondria (90 hits 87.4%) |    | 0.0000 | 0.000 |
| 261 | <a href="#">CL261</a> | 15450 | 103 | 0.015 | 30.50 | Not available | Not available | LTR.Gypsy (21hits, 19.7%)                                                                     | Ty3-RT Ty3/gypsy chromovirus (21 hits 20.4%)                                                                                 |                                        |    | 0.0000 | 0.000 |
| 262 | <a href="#">CL262</a> | 15300 | 102 | 0.015 | 30.50 | Not available | Not available | LINE.L1 (17hits, 9.8%)<br>Low_complexity (1hits, 0.307%)<br>Simple_repeat (1hits, 0.17%)      |                                                                                                                              |                                        |   | 0.0000 | 0.000 |
| 263 | <a href="#">CL263</a> | 15150 | 101 | 0.014 | 30.50 | Not available | Not available | DNA.MULE.MuDR (4hits, 1.67%)<br>DNA.CMC.EnSpm (3hits, 1.15%)<br>Simple_repeat (1hits, 0.152%) |                                                                                                                              |                                        |  | 0.0000 | 0.000 |
| 264 | <a href="#">CL264</a> | 15150 | 101 | 0.014 | 30.50 | Not available | Not available | Simple_repeat (5hits, 0.858%)                                                                 |                                                                                                                              | organelle/mitochondria (84 hits 83.2%) |  | 0.0000 | 0.000 |
| 265 | <a href="#">CL265</a> | 15000 | 100 | 0.014 | 30.60 | Not available | Not available | LTR.Copia (54hits, 32.4%)                                                                     | Ty1-INT Ty1/copia AleII (34 hits 34%)<br>Ty1-PROT Ty1/copia AleII (9 hits 9%)<br>Ty1-INT Ty1/copia AleI/Retrofit (2 hits 2%) |                                        |  | 0.0000 | 0.000 |
| 266 | <a href="#">CL266</a> | 15000 | 100 | 0.014 | 30.60 | Not available | Not available | LTR.Copia (8hits, 2.81%)<br>Simple_repeat (10hits, 2.66%)<br>Low_complexity (4hits, 1.04%)    | Ty1-PROT Ty1/copia Tork (7 hits 7%)                                                                                          | organelle/mitochondria (52 hits 52%)   |  | 0.0000 | 0.000 |
| 267 | <a href="#">CL267</a> | 14850 | 99  | 0.014 | 30.60 | Not available | Not available |                                                                                               |                                                                                                                              |                                        |  | 0.0000 | 0.000 |

|     |                       |       |    |       |       |               |               |                                         |                                                                                     |        |       |
|-----|-----------------------|-------|----|-------|-------|---------------|---------------|-----------------------------------------|-------------------------------------------------------------------------------------|--------|-------|
| 268 | <a href="#">CL268</a> | 14700 | 98 | 0.014 | 30.60 | Not available | Not available | Simple_repeat (2hits, available 0.367%) |  | 0.0000 | 0.000 |
| 269 | <a href="#">CL269</a> | 14250 | 95 | 0.014 | 30.60 | Not available | Not available |                                         | organelle/mitochondria (44 hits 46.3%)                                              | 0.0000 | 0.000 |
| 270 | <a href="#">CL270</a> | 14250 | 95 | 0.014 | 30.60 | Not available | Not available |                                         | organelle/mitochondria (104 hits 109%)                                              | 0.0000 | 0.000 |
| 271 | <a href="#">CL271</a> | 14100 | 94 | 0.013 | 30.60 | Not available | Not available |                                         | organelle/mitochondria (47 hits 50%)<br>organelle/plastid (2 hits 2.13%)            | 0.0000 | 0.000 |
| 272 | <a href="#">CL272</a> | 14100 | 94 | 0.013 | 30.70 | Not available | Not available | LTR.Copia (78hits, available 76.6%)     | Ty1-RT Ty1/copia Tork (47 hits 50%)<br>Ty1-RT Ty1/copia Ivana/Oryco (4 hits 4.26%)  | 0.0000 | 0.000 |
| 273 | <a href="#">CL273</a> | 14100 | 94 | 0.013 | 30.70 | Not available | Not available | Simple_repeat (1hits, available 0.22%)  | organelle/mitochondria (50 hits 53.2%)                                              | 0.0000 | 0.000 |
| 274 | <a href="#">CL274</a> | 13950 | 93 | 0.013 | 30.70 | Not available | Not available |                                         | organelle/mitochondria (92 hits 98.9%)                                              | 0.0000 | 0.000 |
| 275 | <a href="#">CL275</a> | 13950 | 93 | 0.013 | 30.70 | Not available | Not available |                                         | organelle/mitochondria (87 hits 93.5%)                                              | 0.0000 | 0.000 |
| 276 | <a href="#">CL276</a> | 13800 | 92 | 0.013 | 30.70 | Not available | Not available | LTR.Copia (71hits, available 56%)       | Ty1-GAG Ty1/copia Ivana/Oryco (35 hits 38%)                                         | 0.0000 | 0.000 |
| 277 | <a href="#">CL277</a> | 13650 | 91 | 0.013 | 30.70 | Not available | Not available |                                         | organelle/mitochondria (75 hits 82.4%)<br>organelle/plastid (3 hits 3.3%)           | 0.0000 | 0.000 |
| 278 | <a href="#">CL278</a> | 13500 | 90 | 0.013 | 30.70 | Not available | Not available | LTR.Copia (24hits, available 17.7%)     | Ty1-PROT Ty1/copia Angela (6 hits 6.67%)                                            | 0.0000 | 0.000 |

|     |                       |       |    |       |       |               |               |                                                                                                                                                                                                                                             |                                           |                                                                                       |        |       |
|-----|-----------------------|-------|----|-------|-------|---------------|---------------|---------------------------------------------------------------------------------------------------------------------------------------------------------------------------------------------------------------------------------------------|-------------------------------------------|---------------------------------------------------------------------------------------|--------|-------|
| 279 | <a href="#">CL279</a> | 13350 | 89 | 0.013 | 30.70 | Not available | Not available |                                                                                                                                                                                                                                             | organelle/mitochondria<br>(113 hits 127%) |    | 0.3584 | 1.124 |
| 280 | <a href="#">CL280</a> | 13200 | 88 | 0.013 | 30.80 | Not available | Not available |                                                                                                                                                                                                                                             | organelle/mitochondria<br>(42 hits 47.7%) |    | 0.0000 | 0.000 |
| 281 | <a href="#">CL281</a> | 13200 | 88 | 0.013 | 30.80 | Not available | Not available |                                                                                                                                                                                                                                             |                                           |    | 0.0000 | 0.000 |
| 282 | <a href="#">CL282</a> | 13200 | 88 | 0.013 | 30.80 | Not available | Not available |                                                                                                                                                                                                                                             | organelle/mitochondria<br>(31 hits 35.2%) |    | 0.0000 | 0.000 |
| 283 | <a href="#">CL283</a> | 13050 | 87 | 0.012 | 30.80 | Not available | Not available | LTR.Gypsy (47hits, 44.7%)<br>Ty3-GAG Ty3/gypsy chromovirus (24 hits 27.6%)                                                                                                                                                                  |                                           |    | 0.0000 | 0.000 |
| 284 | <a href="#">CL284</a> | 13050 | 87 | 0.012 | 30.80 | Not available | Not available | Simple_repeat (4hits, 1.1%)<br>Low_complexity (4hits, 1.1%)                                                                                                                                                                                 | organelle/mitochondria<br>(64 hits 73.6%) |   | 0.0000 | 0.000 |
| 285 | <a href="#">CL285</a> | 13050 | 87 | 0.012 | 30.80 | Not available | Not available |                                                                                                                                                                                                                                             | organelle/mitochondria<br>(98 hits 113%)  |  | 0.0000 | 0.000 |
| 286 | <a href="#">CL286</a> | 12900 | 86 | 0.012 | 30.80 | Not available | Not available | LTR.Copia (68hits, 76%)<br>Ty1-RH Ty1/copia Angela (31 hits 36%)<br>Ty1-RT Ty1/copia Angela (5 hits 5.81%)<br>Ty1-RT Ty1/copia Tork (4 hits 4.65%)<br>Ty1-RH Ty1/copia Alel/Retrofit (3 hits 3.49%)<br>Ty1-RH Ty1/copia Tork (2 hits 2.33%) |                                           |  | 0.0000 | 0.000 |
| 287 | <a href="#">CL287</a> | 12900 | 86 | 0.012 | 30.80 | Not available | Not available | LTR (45hits, 20.9%)<br>LTR.Cassandra (19hits, 9.68%)<br>LTR.Gypsy (1hits, 0.225%)                                                                                                                                                           |                                           |  | 0.0000 | 0.000 |
| 288 | <a href="#">CL288</a> | 12750 | 85 | 0.012 | 30.90 | Not available | Not available |                                                                                                                                                                                                                                             | organelle/mitochondria<br>(35 hits 41.2%) |  | 0.0000 | 0.000 |

|     |                       |       |    |       |       |               |               |                                                                                           |                                                                                                                                                                          |                                       |                                                                                       |        |       |
|-----|-----------------------|-------|----|-------|-------|---------------|---------------|-------------------------------------------------------------------------------------------|--------------------------------------------------------------------------------------------------------------------------------------------------------------------------|---------------------------------------|---------------------------------------------------------------------------------------|--------|-------|
| 289 | <a href="#">CL289</a> | 12600 | 84 | 0.012 | 30.90 | Not available | Not available | LINE.L1 (28hits, 23.9%)                                                                   | LINE-RT NA NA (45 hits 53.6%)                                                                                                                                            | organelle/mitochondria (84 hits 100%) | 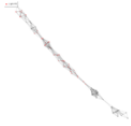    | 0.9615 | 2.381 |
| 290 | <a href="#">CL290</a> | 12600 | 84 | 0.012 | 30.90 | Not available | Not available | LTR.Copia (7hits, 6.24%)<br>Simple_repeat (5hits, 2.13%)                                  |                                                                                                                                                                          |                                       |    | 0.0000 | 0.000 |
| 291 | <a href="#">CL291</a> | 12450 | 83 | 0.012 | 30.90 | Not available | Not available | Simple_repeat (2hits, 0.578%)                                                             |                                                                                                                                                                          |                                       |    | 2.3670 | 3.614 |
| 292 | <a href="#">CL292</a> | 12450 | 83 | 0.012 | 30.90 | Not available | Not available |                                                                                           |                                                                                                                                                                          | organelle/mitochondria (4 hits 4.82%) |    | 0.0000 | 0.000 |
| 293 | <a href="#">CL293</a> | 12450 | 83 | 0.012 | 30.90 | Not available | Not available | Low_complexity (7hits, 2.28%)<br>Simple_repeat (5hits, 1.55%)<br>Satellite (6hits, 1.49%) |                                                                                                                                                                          |                                       |    | 0.0000 | 0.000 |
| 294 | <a href="#">CL294</a> | 12450 | 83 | 0.012 | 30.90 | Not available | Not available | Simple_repeat (5hits, 2.24%)<br>Low_complexity (5hits, 1.86%)                             |                                                                                                                                                                          |                                       |   | 0.0000 | 0.000 |
| 295 | <a href="#">CL295</a> | 12450 | 83 | 0.012 | 30.90 | Not available | Not available | Simple_repeat (4hits, 0.827%)<br>Low_complexity (1hits, 0.281%)                           |                                                                                                                                                                          |                                       |  | 0.0000 | 0.000 |
| 296 | <a href="#">CL296</a> | 12300 | 82 | 0.012 | 31.00 | Not available | Not available |                                                                                           |                                                                                                                                                                          | organelle/mitochondria (96 hits 117%) |  | 0.0000 | 0.000 |
| 297 | <a href="#">CL297</a> | 12300 | 82 | 0.012 | 31.00 | Not available | Not available | LTR.Copia (89hits, 72.3%)                                                                 | Ty1-INT Ty1/copia AleII (42 hits 51.2%)<br>Ty1-PROT Ty1/copia AleII (5 hits 6.1%)                                                                                        |                                       |  | 0.0000 | 0.000 |
| 298 | <a href="#">CL298</a> | 12150 | 81 | 0.012 | 31.00 | Not available | Not available | Simple_repeat (1hits, 0.23%)                                                              |                                                                                                                                                                          |                                       |  | 0.0000 | 0.000 |
| 299 | <a href="#">CL299</a> | 12000 | 80 | 0.011 | 31.00 | Not available | Not available | LTR.Copia (74hits, 86.9%)<br>Simple_repeat (5hits, 0.833%)                                | Ty1-INT Ty1/copia Ivana/Oryco (41 hits 51.2%)<br>Ty1-INT Ty1/copia AleII (5 hits 6.25%)<br>Ty1-INT Ty1/copia TAR (1 hits 1.25%)<br>Ty1-INT Ty1/copia Tork (1 hits 1.25%) |                                       |  | 0.0000 | 0.000 |

|     |                       |       |    |       |       |               |                                                                                  |                                                                                                                                                                                                                                    |                                                                                       |                                                                                       |        |       |
|-----|-----------------------|-------|----|-------|-------|---------------|----------------------------------------------------------------------------------|------------------------------------------------------------------------------------------------------------------------------------------------------------------------------------------------------------------------------------|---------------------------------------------------------------------------------------|---------------------------------------------------------------------------------------|--------|-------|
| 300 | <a href="#">CL300</a> | 12000 | 80 | 0.011 | 31.00 | Not available | Not available                                                                    | organelle/mitochondria (28 hits 35%)                                                                                                                                                                                               |     | 0.0000                                                                                | 0.000  |       |
| 301 | <a href="#">CL301</a> | 12000 | 80 | 0.011 | 31.00 | Not available | Not available                                                                    | organelle/mitochondria (16 hits 20%)                                                                                                                                                                                               |    | 0.0000                                                                                | 0.000  |       |
| 302 | <a href="#">CL302</a> | 11850 | 79 | 0.011 | 31.00 | Not available | Not available                                                                    | organelle/mitochondria (46 hits 58.2%)                                                                                                                                                                                             |    | 0.0000                                                                                | 0.000  |       |
| 303 | <a href="#">CL303</a> | 11700 | 78 | 0.011 | 31.00 | Not available | Not available<br>Low_complexity (3hits, 0.923%)<br>Simple_repeat (1hits, 0.308%) | organelle/mitochondria (57 hits 73.1%)                                                                                                                                                                                             |    | 0.0000                                                                                | 0.000  |       |
| 304 | <a href="#">CL304</a> | 11700 | 78 | 0.011 | 31.00 | Not available | Not available                                                                    |                                                                                                                                                                                                                                    |    | 0.0000                                                                                | 0.000  |       |
| 305 | <a href="#">CL305</a> | 11700 | 78 | 0.011 | 31.10 | Not available | Not available                                                                    | organelle/mitochondria (94 hits 121%)                                                                                                                                                                                              |  | 0.0000                                                                                | 0.000  |       |
| 306 | <a href="#">CL306</a> | 11550 | 77 | 0.011 | 31.10 | Not available | Not available                                                                    | organelle/mitochondria (71 hits 92.2%)                                                                                                                                                                                             |  | 0.0000                                                                                | 0.000  |       |
| 307 | <a href="#">CL307</a> | 11550 | 77 | 0.011 | 31.10 | Not available | Not available<br>Low_complexity (3hits, 0.987%)<br>Simple_repeat (1hits, 0.303%) | organelle/mitochondria (27 hits 35.1%)                                                                                                                                                                                             |  | 0.0000                                                                                | 0.000  |       |
| 308 | <a href="#">CL308</a> | 11550 | 77 | 0.011 | 31.10 | Not available | Not available<br>LTR.Copia (61hits, 68.1%)                                       | Ty1-INT Ty1/copia unclass(Ale) (18 hits 23.4%)<br>Ty1-INT Ty1/copia AleII (13 hits 16.9%)<br>Ty1-PROT Ty1/copia AleI/Retrofit (5 hits 6.49%)<br>Ty1-INT Ty1/copia AleI/Retrofit (4 hits 5.19%)<br>Ty1-INT Ty1/copia Angela (.....) |  | 0.0000                                                                                | 0.000  |       |
| 309 | <a href="#">CL309</a> | 11550 | 77 | 0.011 | 31.10 | Not available | Not available<br>LTR.Gypsy (4hits, 2.35%)                                        | Ty3-RH Ty3/gypsy chromovirus (1 hits 1.3%)                                                                                                                                                                                         | organelle/mitochondria (96 hits 125%)                                                 |  | 0.0000 | 0.000 |

|     |                       |       |    |       |       |               |               |                                                             |                                                                                                                               |                                                                                      |                                                                                       |        |       |
|-----|-----------------------|-------|----|-------|-------|---------------|---------------|-------------------------------------------------------------|-------------------------------------------------------------------------------------------------------------------------------|--------------------------------------------------------------------------------------|---------------------------------------------------------------------------------------|--------|-------|
| 310 | <a href="#">CL310</a> | 11400 | 76 | 0.011 | 31.10 | Not available | Not available |                                                             | organelle/mitochondria (63 hits 82.9%)                                                                                        |     | 0.0000                                                                                | 0.000  |       |
| 311 | <a href="#">CL311</a> | 11400 | 76 | 0.011 | 31.10 | Not available | Not available | LTR.Copia (72hits, 86.1%)                                   | Ty1-RH Ty1/copia Tork (27 hits 35.5%)<br>Ty1-RT Ty1/copia Tork (23 hits 30.3%)<br>Ty1-RH Ty1/copia Ivana/Oryco (2 hits 2.63%) |   | 0.0000                                                                                | 0.000  |       |
| 312 | <a href="#">CL312</a> | 11250 | 75 | 0.011 | 31.10 | Not available | Not available | LTR.Copia (74hits, 94.6%)                                   | Ty1-RH Ty1/copia Tork (43 hits 57.3%)<br>Ty1-RT Ty1/copia Tork (8 hits 10.7%)                                                 | organelle/mitochondria (9 hits 12%)                                                  |    | 0.0000 | 0.000 |
| 313 | <a href="#">CL313</a> | 11250 | 75 | 0.011 | 31.10 | Not available | Not available | DNA.hAT.Ac (34hits, 35.7%)<br>Simple_repeat (2hits, 0.587%) | DTA-CD1 NA NA (23 hits 30.7%)                                                                                                 |   | 0.0000                                                                                | 0.000  |       |
| 314 | <a href="#">CL314</a> | 11100 | 74 | 0.011 | 31.20 | Not available | Not available |                                                             | organelle/mitochondria (74 hits 100%)                                                                                         |   | 0.0000                                                                                | 0.000  |       |
| 315 | <a href="#">CL315</a> | 11100 | 74 | 0.011 | 31.20 | Not available | Not available | LINE.L1 (29hits, 24.1%)<br>Simple_repeat (1hits, 0.216%)    |                                                                                                                               |  | 0.0000                                                                                | 0.000  |       |
| 316 | <a href="#">CL316</a> | 10950 | 73 | 0.010 | 31.20 | Not available | Not available | LTR.Gypsy (42hits, 54.9%)                                   | Ty3-RT Ty3/gypsy Ogre/Tat (20 hits 27.4%)<br>Ty3-RH Ty3/gypsy Athila (1 hits 1.37%)                                           | organelle/mitochondria (8 hits 11%)                                                  |  | 0.0000 | 0.000 |
| 317 | <a href="#">CL317</a> | 10950 | 73 | 0.010 | 31.20 | Not available | Not available | Low_complexity (6hits, 1.59%)                               |                                                                                                                               | organelle/mitochondria (5 hits 6.85%)                                                |  | 0.0000 | 0.000 |
| 318 | <a href="#">CL318</a> | 10650 | 71 | 0.010 | 31.20 | Not available | Not available |                                                             |                                                                                                                               | organelle/mitochondria (60 hits 84.5%)                                               |  | 0.0000 | 0.000 |
| 319 | <a href="#">CL319</a> | 10650 | 71 | 0.010 | 31.20 | Not available | Not available |                                                             |                                                                                                                               | organelle/mitochondria (11 hits 15.5%)                                               |  | 0.0000 | 0.000 |
| 320 | <a href="#">CL320</a> | 10650 | 71 | 0.010 | 31.20 | Not available | Not available | LTR.Copia (11hits, 6.27%)                                   |                                                                                                                               | organelle/mitochondria (73 hits 103%)                                                |  | 0.0000 | 0.000 |



|     |                       |       |    |       |       |               |               |                                                                                                                               |                                                                                     |        |       |
|-----|-----------------------|-------|----|-------|-------|---------------|---------------|-------------------------------------------------------------------------------------------------------------------------------|-------------------------------------------------------------------------------------|--------|-------|
| 321 | <a href="#">CL321</a> | 10650 | 71 | 0.010 | 31.20 | Not available | Not available | LTR.Copia (10hits, 11.2%)                                                                                                     | organelle/mitochondria (8 hits 11.3%)                                               | 0.0000 | 0.000 |
| 322 | <a href="#">CL322</a> | 10650 | 71 | 0.010 | 31.20 | Not available | Not available | LTR.Caulimovirus (8hits, 7.73%)<br>Simple_repeat (13hits, 6.3%)<br>LTR.Copia (2hits, 0.77%)<br>Low_complexity (1hits, 0.732%) |  | 0.0000 | 0.000 |
| 323 | <a href="#">CL323</a> | 10500 | 70 | 0.010 | 31.20 | Not available | Not available | Simple_repeat (1hits, 0.2%)<br>DTM-CD1 NA NA (40 hits 57.1%)<br>LINE-RT NA NA (1 hits 1.43%)                                  |  | 0.0000 | 0.000 |
| 324 | <a href="#">CL324</a> | 10500 | 70 | 0.010 | 31.30 | Not available | Not available | Simple_repeat (8hits, 1.89%)                                                                                                  | organelle/mitochondria (1 hits 1.43%)                                               | 0.0000 | 0.000 |
